# Supplementary material
Source: PubMed Central journal article supplement (PMC10734416)
Supplement: aem.00630-23-s0001.pdf [file aem.00630-23-s0001.pdf]

**Table S1. Proteins identified by LC-MS from cultures of *B. ambifaria* T16 grown in M9 minimal medium with sodium citrate (M9+CA) or fusaric acid (M9+FA) as sole carbon source.**

The sign + indicates significant differences in protein abundance between the two cultivation conditions

| Protein ID                       | Predicted function                                                  | Log <sub>2</sub> LQ(FA-CA) | Student's T-test |
|----------------------------------|---------------------------------------------------------------------|----------------------------|------------------|
| NHL70922.1                       | LLM class flavin-dependent oxidoreductase                           | 10.8779                    | +                |
| NHL70923.1                       | enoyl-CoA hydratase                                                 | 9.99548                    | +                |
| NHL70917.1                       | 3,4-dihydroxy-2-butanone-4-phosphate synthase                       | 8.95027                    | +                |
| NHL70920.1                       | enoyl-CoA hydratase/isomerase family protein                        | 8.94157                    | +                |
| NHL70924.1                       | AMP-binding protein                                                 | 8.89944                    | +                |
| NHL70914.1                       | dihydrolipoyllysine-residue acetyltransferase                       | 7.88209                    | +                |
| NHL70913.1                       | alpha-ketoglutarate dehydrogenase                                   | 7.67605                    | +                |
| NHL70918.1                       | acyl-CoA synthetase                                                 | 7.54677                    | +                |
| NHL70921.1                       | creatininase family protein                                         | 7.22397                    | +                |
| NHL70094.1                       | CoA transferase                                                     | 7.20016                    | +                |
| NHL65703.1                       | formate dehydrogenase subunit alpha                                 | 6.65666                    | +                |
| NHL70916.1                       | Lrp/AsnC family transcriptional regulator                           | 6.24661                    | +                |
| NHL69612.1                       | acyl-CoA dehydrogenase                                              | 6.17527                    | +                |
| NHL70098.1                       | methylsuccinate lyase PrpB                                          | 6.05959                    | +                |
| NHL70095.1                       | 2-methylaconitate cis-trans isomerase PrpF                          | 5.86579                    | +                |
| NHL70097.1                       | 2-methylcitrate synthase PrpC                                       | 5.72597                    | +                |
| NHL70239.1                       | AMP-binding protein                                                 | 5.56256                    | +                |
| NHL70096.1                       | Fe/S-dependent 2-methylsuccinate dehydratase AcnD                   | 5.38894                    | +                |
| NHL65705.1                       | formate dehydrogenase                                               | 5.32041                    | +                |
| NHL70420.1                       | 3-hydroxyacyl-CoA dehydrogenase                                     | 5.21292                    | +                |
| NHL69608.1                       | enoyl-CoA hydratase                                                 | 5.11912                    | +                |
| NHL70226.1                       | acyl-CoA dehydrogenase                                              | 5.0336                     | +                |
| NHL69611.1                       | AMP-binding protein                                                 | 4.98733                    | +                |
| NHL69181.1                       | MEKHLA domain-containing protein                                    | 4.97697                    | +                |
| NHL65704.1                       | formate dehydrogenase                                               | 4.93761                    | +                |
| NHL70421.1                       | AMP-binding protein                                                 | 4.91595                    | +                |
| NHL71193.1                       | 3-hydroxybutyryl-CoA dehydrogenase                                  | 4.85804                    | +                |
| NHL71194.1                       | acetyl-CoA C-acyltransferase family protein                         | 4.6218                     | +                |
| NHL68896.1                       | acyl-CoA synthetase                                                 | 4.4809                     | +                |
| NHL70908.1                       | DUF4148 domain-containing protein                                   | 4.29526                    | +                |
| NHL70419.1                       | acetyl-CoA C-acyltransferase                                        | 4.17029                    | +                |
| NHL66293.1                       | amino acid adenylation domain-containing protein                    | 4.05543                    | +                |
| NHL67411.1                       | CHRD domain-containing protein                                      | 4.02644                    | +                |
| NHL69609.1                       | 3-hydroxyisobutyrate dehydrogenase                                  | 3.93346                    | +                |
| NHL68402.1                       | dehydrogenase                                                       | 3.79089                    | +                |
| NHL71102.1                       | tryptophan-tRNA ligase                                              | 3.65071                    | +                |
| NHL69610.1                       | CoA-acylating methylmalonate-semialdehyde dehydrogenase             | 3.5291                     | +                |
| NHL66071.1                       | NUDIX domain-containing protein                                     | 3.49351                    | +                |
| NHL67339.1                       | glycerol kinase GlpK                                                | 3.36444                    | +                |
| NHL65032.1                       | 4-hydroxyphenylpyruvate dioxygenase                                 | 3.25747                    | +                |
| NHL66022.1                       | porin                                                               | 3.20126                    | +                |
| NHL66109.1                       | LysR family transcriptional regulator                               | 3.16789                    | +                |
| NHL70225.1,NHL71195.1,NHL66124.1 | electron transfer flavoprotein-ubiquinone oxidoreductase            | 2.99696                    | +                |
| NHL68498.1                       | DUF4148 domain-containing protein                                   | 2.97625                    | +                |
| NHL70004.1                       | oxidoreductase                                                      | 2.70688                    | +                |
| NHL65234.1                       | anthranilate synthase component I                                   | 2.67805                    | +                |
| NHL69607.1                       | enoyl-CoA hydratase/isomerase family protein                        | 2.66751                    | +                |
| NHL67218.1                       | site-specific tyrosine recombinase XerD                             | 2.65281                    | +                |
| NHL66091.1                       | CoA-acylating methylmalonate-semialdehyde dehydrogenase             | 2.61771                    | +                |
| NHL66438.1                       | lipocalin-like domain-containing protein                            | 2.56322                    | +                |
| NHL65232.1                       | anthranilate phosphoribosyltransferase                              | 2.54011                    | +                |
| NHL65976.1                       | phosphohistidine phosphatase SixA                                   | 2.52072                    | +                |
| NHL67947.1                       | phosphatase                                                         | 2.4792                     | +                |
| NHL64862.1                       | class IV adenylate cyclase                                          | 2.47569                    | +                |
| NHL67236.1                       | kynureninase                                                        | 2.4506                     | +                |
| NHL66444.1                       | zinc-binding alcohol dehydrogenase family protein                   | 2.44262                    | +                |
| NHL69872.1                       | hypothetical protein EIB72_26190                                    | 2.43349                    | +                |
| NHL64889.1                       | AMP-binding protein                                                 | 2.41337                    | +                |
| NHL65836.1                       | glucarate dehydratase                                               | 2.40829                    | +                |
| NHL70849.1                       | amino acid racemase                                                 | 2.39926                    | +                |
| NHL69007.1                       | M4 family metalloproteinase                                         | 2.38937                    | +                |
| NHL65669.1                       | DNA-directed RNA polymerase subunit omega                           | 2.34394                    | +                |
| NHL66551.1                       | glycosyltransferase family 4 protein                                | 2.30574                    | +                |
| NHL67472.1                       | 16S rRNA (guanine(966)-N(2))-methyltransferase RsmD                 | 2.25918                    | +                |
| NHL70680.1                       | ABC transporter substrate-binding protein                           | 2.19513                    | +                |
| NHL65233.1                       | aminodeoxychorismate/anthranilate synthase component II             | 2.14417                    | +                |
| NHL65231.1                       | indole-3-glycerol phosphate synthase TrpC                           | 2.04142                    | +                |
| NHL68728.1                       | acetyl-CoA hydrolase/transferase family protein                     | 2.02055                    | +                |
| NHL66748.1                       | sensor histidine kinase                                             | 2.01995                    | +                |
| NHL66014.1                       | xanthine dehydrogenase family protein molybdopterin-binding subunit | 2.01864                    | +                |
| NHL68887.1                       | SDR family oxidoreductase                                           | 1.96864                    | +                |
| NHL65559.1                       | symmetrical bis(5-nucleosyl)-tetraphosphatase                       | 1.89411                    | +                |
| NHL67228.1                       | class I SAM-dependent methyltransferase                             | 1.88029                    | +                |
| NHL65418.1                       | non-specific DNA-binding protein DpsA                               | 1.83474                    | +                |
| NHL69673.1                       | ABC transporter substrate-binding protein                           | 1.83123                    | +                |
| NHL67258.1                       | zinc ABC transporter solute-binding protein                         | 1.83042                    | +                |
| NHL70390.1,NHL69274.1            | fumarylacetoacetase                                                 | 1.83006                    | +                |
| NHL66579.1                       | fatty acid-CoA ligase                                               | 1.80494                    | +                |
| NHL67229.1                       | DUF72 domain-containing protein                                     | 1.79267                    | +                |
| NHL70744.1                       | cupin domain-containing protein                                     | 1.78307                    | +                |
| NHL65762.1                       | class II fumarate hydratase                                         | 1.73968                    | +                |
| NHL64932.1                       | cytochrome c5 family protein                                        | 1.73266                    | +                |
| NHL67855.1                       | acetoacetate decarboxylase                                          | 1.70752                    | +                |
| NHL70449.1                       | DUF4148 domain-containing protein                                   | 1.65259                    | +                |
| NHL70146.1                       | PRC-barrel domain containing protein                                | 1.65161                    | +                |
| NHL69916.1                       | aldehyde dehydrogenase (NADP(+))                                    | 1.63026                    | +                |
| NHL67237.1                       | tryptophan 2,3-dioxygenase                                          | 1.62703                    | +                |
| NHL70102.1                       | fumarylacetoacetate hydrolase family protein                        | 1.62459                    | +                |
| NHL70756.1                       | haloacid dehalogenase type II                                       | 1.61909                    | +                |
| NHL67989.1                       | 5/3-nucleotidase SurE                                               | 1.59991                    | +                |
| NHL65333.1                       | 16S rRNA (uracil(1498)-N(3))-methyltransferase                      | 1.59734                    | +                |
| NHL66795.1                       | phasin family protein                                               | 1.59558                    | +                |
| NHL70154.1                       | aldolase                                                            | 1.59418                    | +                |

|                       |                                                           |          |   |
|-----------------------|-----------------------------------------------------------|----------|---|
| NHL68017.1            | ubiquinone-dependent pyruvate dehydrogenase               | 1.58407  | + |
| NHL68515.1            | SRPBCC domain-containing protein                          | 1.57737  |   |
| NHL68622.1            | DUF427 domain-containing protein                          | 1.54425  | + |
| NHL69046.1            | isocitrate lyase                                          | 1.54064  | + |
| NHL68923.1            | cytosine deaminase                                        | 1.53863  |   |
| NHL70716.1            | SnoL-like domain-containing protein                       | 1.53435  |   |
| NHL69821.1            | enoyl-CoA hydratase/isomerase family protein              | 1.52505  |   |
| NHL70915.1            | dihydropolyl dehydrogenase                                | 1.5232   | + |
| NHL64989.1            | pyridoxamine 5-phosphate oxidase                          | 1.51982  | + |
| NHL67701.1            | High potential iron-sulfur protein                        | 1.51602  |   |
| NHL67616.1            | hydroxymethylglutaryl-CoA lyase                           | 1.51198  | + |
| NHL65249.1            | division/cell wall cluster transcriptional repressor MraZ | 1.51004  |   |
| NHL68535.1            | glutathione S-transferase                                 | 1.48493  |   |
| NHL70162.1            | SnoL-like domain-containing protein                       | 1.44812  | + |
| NHL67883.1            | universal stress protein                                  | 1.44773  | + |
| NHL67071.1            | aldehyde dehydrogenase family protein                     | 1.44719  |   |
| NHL67862.1            | hypothetical protein EIB72_15895                          | 1.44548  | + |
| NHL67581.1            | MBL fold metallo-hydrolase                                | 1.43525  | + |
| NHL68666.1            | phospholipase                                             | 1.42518  |   |
| NHL67622.1            | nitronate monooxygenase                                   | 1.41675  | + |
| NHL67820.1            | membrane protein insertase YidC                           | 1.40851  |   |
| NHL70105.1            | GNAT family N-acetyltransferase                           | 1.4064   | + |
| NHL67143.1            | SDR family oxidoreductase                                 | 1.4033   |   |
| NHL65530.1            | polyketide cyclase                                        | 1.39811  | + |
| NHL66894.1            | enoyl-CoA hydratase                                       | 1.39469  |   |
| NHL67645.1            | heavy-metal-associated domain-containing protein          | 1.38503  | + |
| NHL70531.1            | MEKHLA domain-containing protein                          | 1.36346  | + |
| NHL70546.1            | YncE family protein                                       | 1.36157  | + |
| NHL71138.1            | 3-deoxy-D-arabino-heptulosonate 7-phosphate synthase      | 1.35114  | + |
| NHL67438.1            | TIGRO1841 family phasin                                   | 1.34632  | + |
| NHL69118.1            | aldo/keto reductase                                       | 1.32054  | + |
| NHL65416.1            | catalase/peroxidase HPI                                   | 1.30071  | + |
| NHL67086.1            | DUF1311 domain-containing protein                         | 1.26373  |   |
| NHL66297.1            | N(5)-hydroxyornithine transformylase PvdF                 | 1.26353  |   |
| NHL70810.1            | chaperonin GroEL                                          | 1.24759  |   |
| NHL65230.1            | CYTH domain-containing protein                            | 1.23925  |   |
| NHL65877.1            | Lrp/AsnC family transcriptional regulator                 | 1.23638  |   |
| NHL66879.1;NHL67854.1 | 3-hydroxybutyrate dehydrogenase                           | 1.22692  | + |
| NHL68867.1            | rhodanese-related sulfurtransferase                       | 1.22104  |   |
| NHL70496.1            | hypothetical protein EIB72_29410                          | 1.21287  | + |
| NHL67614.1            | VOC family protein                                        | 1.20322  |   |
| NHL66764.1            | gamma carbonic anhydrase family protein                   | 1.18438  |   |
| NHL66077.1            | glucose 1-dehydrogenase                                   | 1.18065  |   |
| NHL66578.1            | 3-hydroxyacyl-CoA dehydrogenase                           | 1.16955  | + |
| NHL68619.1            | iron-containing alcohol dehydrogenase                     | 1.16091  |   |
| NHL66134.1            | alpha/beta hydrolase                                      | 1.15595  |   |
| NHL66218.1            | heme-degrading domain-containing protein                  | 1.15038  |   |
| NHL67231.1            | selenium-binding protein                                  | 1.14344  |   |
| NHL70087.1            | N-acylglucosamine 2-epimerase                             | 1.13754  |   |
| NHL69785.1            | NAD-binding protein                                       | 1.12814  | + |
| NHL65426.1            | cob(I)yrinic acid a,c-diamide adenosyltransferase         | 1.12335  | + |
| NHL65116.1            | FAD-dependent oxidoreductase                              | 1.12056  | + |
| NHL64890.1            | transporter substrate-binding domain-containing protein   | 1.1196   |   |
| NHL70504.1            | hypothetical protein EIB72_29450                          | 1.11649  |   |
| NHL67253.1            | sugar ABC transporter substrate-binding protein           | 1.11557  |   |
| NHL67406.1            | DJ-1/PfpI family protein                                  | 1.11443  | + |
| NHL69678.1            | fumarylacetoacetate hydrolase family protein              | 1.11418  | + |
| NHL67225.1            | thioredoxin                                               | 1.11143  | + |
| NHL69677.1            | L-fuconate dehydratase                                    | 1.09697  |   |
| NHL70380.1            | nuclear transport factor 2 family protein                 | 1.09631  | + |
| NHL71086.1            | bactericin family protein                                 | 1.09027  | + |
| NHL65018.1            | NAD(P)-dependent oxidoreductase                           | 1.08915  | + |
| NHL65446.1            | 3-methyl-2-oxobutanoate hydroxymethyltransferase          | 1.08836  | + |
| NHL71137.1            | 2-keto-4-pentenoate hydratase                             | 1.08249  |   |
| NHL70500.1            | amino acid adenylation domain-containing protein          | 1.08138  | + |
| NHL70494.1            | hypothetical protein EIB72_29400                          | 1.07587  | + |
| NHL69588.1            | amylase-1,6-glucosidase                                   | 1.0701   |   |
| NHL69676.1            | SDR family oxidoreductase                                 | 1.06547  |   |
| NHL66918.1            | NAD(P)H-quinone oxidoreductase                            | 1.06463  | + |
| NHL68192.1            | leucyl aminopeptidase                                     | 1.05051  |   |
| NHL68584.1            | VOC family protein                                        | 1.04428  | + |
| NHL69354.1            | class I SAM-dependent methyltransferase                   | 1.03983  |   |
| NHL65172.1            | DotU family type IV/VI secretion system protein           | 1.03426  |   |
| NHL67266.1            | efflux RND transporter permease subunit                   | 1.02751  |   |
| NHL69357.1            | arylamine N-acetyltransferase                             | 1.02656  |   |
| NHL68449.1            | organic hydroperoxide resistance protein                  | 1.02579  |   |
| NHL65861.1            | peroxiredoxin                                             | 1.02475  | + |
| NHL67268.1            | TetR family transcriptional regulator                     | 1.0188   |   |
| NHL64871.1            | ABC transporter substrate-binding protein                 | 1.01755  | + |
| NHL66487.1            | RNA polymerase sigma factor RpoS                          | 1.0128   |   |
| NHL70262.1            | S-(hydroxymethyl)glutathione synthase                     | 1.00183  |   |
| NHL65497.1            | SDR family NAD(P)-dependent oxidoreductase                | 0.991478 | + |
| NHL66457.1            | class I poly(R)-hydroxyalkanoic acid synthase             | 0.986418 | + |
| NHL68998.1            | antibiotic biosynthesis monooxygenase                     | 0.983224 |   |
| NHL69587.1            | hypothetical protein EIB72_24740                          | 0.973213 |   |
| NHL68238.1            | FAD-containing oxidoreductase                             | 0.973174 | + |
| NHL70553.1            | dihydrodipicolinate synthase family protein               | 0.973125 |   |
| NHL66129.1;NHL70935.1 | CoA transferase subunit B                                 | 0.970384 |   |
| NHL67587.1            | adenosylmethionine-8-amino-7-oxononanoate transaminase    | 0.967972 |   |
| NHL66895.1            | thiol:disulfide oxidoreductase                            | 0.967658 |   |
| NHL71112.1            | glutathione S-transferase family protein                  | 0.960644 |   |
| NHL65663.1            | hypothetical protein EIB72_04545                          | 0.960079 | + |
| NHL64897.1            | DNA alkylation response protein                           | 0.957767 |   |
| NHL67211.1            | DUF3579 domain-containing protein                         | 0.954816 |   |
| NHL70228.1            | SDR family oxidoreductase                                 | 0.95291  |   |
| NHL65195.1            | YegP family protein                                       | 0.945419 | + |
| NHL68096.1            | helix-turn-helix transcriptional regulator                | 0.945122 |   |
| NHL68520.1            | CoA ester lyase                                           | 0.943452 |   |

|                       |                                                                                            |          |   |
|-----------------------|--------------------------------------------------------------------------------------------|----------|---|
| NHL64859.1            | 4a-hydroxytetrahydrobiopterin dehydratase                                                  | 0.942357 |   |
| NHL67072.1            | SDR family oxidoreductase                                                                  | 0.937981 | + |
| NHL67470.1            | YfhL family 4Fe-4S dicluster ferredoxin                                                    | 0.937948 |   |
| NHL65933.1            | malonate decarboxylase subunit alpha                                                       | 0.936485 |   |
| NHL65880.1            | Fe(3+) ABC transporter substrate-binding protein                                           | 0.932474 | + |
| NHL67590.1            | biotin synthase BioB                                                                       | 0.931899 | + |
| NHL65244.1            | enoyl-CoA hydratase                                                                        | 0.927398 | + |
| NHL68232.1            | hypothetical protein EIB72_17775                                                           | 0.926587 | + |
| NHL65537.1            | DsbA family oxidoreductase                                                                 | 0.919928 |   |
| NHL66807.1            | S9 family peptidase                                                                        | 0.916667 |   |
| NHL65264.1            | peroxiredoxin                                                                              | 0.911151 |   |
| NHL70493.1            | PLP-dependent aminotransferase family protein                                              | 0.909181 |   |
| NHL66463.1            | YdcH family protein                                                                        | 0.90447  |   |
| NHL67589.1            | dethiobiotin synthase                                                                      | 0.904186 |   |
| NHL64854.1            | NADH:flavin oxidoreductase/NADH oxidase                                                    | 0.902859 |   |
| NHL70025.1            | ABC transporter substrate-binding protein                                                  | 0.902599 | + |
| NHL65842.1            | LLM class flavin-dependent oxidoreductase                                                  | 0.901929 |   |
| NHL64918.1            | thiamine pyrophosphate-binding protein                                                     | 0.901844 | + |
| NHL66597.1            | glycerate kinase                                                                           | 0.901342 |   |
| NHL64985.1            | dienelactone hydrolase family protein                                                      | 0.891255 | + |
| NHL65863.1            | NYN domain-containing protein                                                              | 0.890667 |   |
| NHL70217.1            | alpha/beta fold hydrolase                                                                  | 0.89036  |   |
| NHL67244.1            | xylulokinase                                                                               | 0.889406 | + |
| NHL65352.1            | DNA polymerase III subunit delta                                                           | 0.888267 |   |
| NHL70460.1            | TOBE domain-containing protein                                                             | 0.883684 |   |
| NHL67064.1            | P-II family nitrogen regulator                                                             | 0.874025 | + |
| NHL68833.1            | DUF3564 family protein                                                                     | 0.866711 | + |
| NHL71122.1            | DUF4011 domain-containing protein                                                          | 0.865105 | + |
| NHL66455.1            | 3-ketoacyl-ACP reductase                                                                   | 0.862083 | + |
| NHL68376.1            | aldehyde dehydrogenase family protein                                                      | 0.860981 | + |
| NHL67584.1            | SDR family oxidoreductase                                                                  | 0.85936  |   |
| NHL66899.1            | pimeloyl-CoA dehydrogenase large subunit                                                   | 0.856785 |   |
| NHL66135.1            | RidA family protein                                                                        | 0.856109 |   |
| NHL67407.1            | MarR family transcriptional regulator                                                      | 0.855038 |   |
| NHL65549.1            | chaperonin GroEL                                                                           | 0.854628 | + |
| NHL66516.1            | molybdenum cofactor biosynthesis protein MoaE                                              | 0.853041 |   |
| NHL67793.1            | Paal family thioesterase                                                                   | 0.853012 | + |
| NHL66231.1            | GNAT family N-acetyltransferase                                                            | 0.850117 |   |
| NHL69876.1            | S8/S53 family peptidase                                                                    | 0.845196 | + |
| NHL67560.1            | type III pantothenate kinase                                                               | 0.844824 |   |
| NHL67161.1            | L-aspartate oxidase                                                                        | 0.840496 | + |
| NHL66618.1            | acetylornithine deacetylase                                                                | 0.840385 | + |
| NHL66040.1            | cellulase                                                                                  | 0.836685 |   |
| NHL67379.1            | nitrate reductase maturation protein NarM                                                  | 0.836613 |   |
| NHL64906.1            | Gyrl-like domain-containing protein                                                        | 0.835655 |   |
| NHL66155.1            | pyridoxal phosphate-dependent aminotransferase                                             | 0.831394 |   |
| NHL65929.1            | 3-hydroxyacyl-CoA dehydrogenase                                                            | 0.831327 | + |
| NHL65441.1            | nucleotide exchange factor GrpE                                                            | 0.828821 |   |
| NHL68300.1            | alpha/beta hydrolase                                                                       | 0.828585 | + |
| NHL65298.1            | histone H1-like DNA-binding protein                                                        | 0.827909 |   |
| NHL68695.1            | cytochrome c                                                                               | 0.824148 | + |
| NHL65720.1            | integration host factor subunit beta                                                       | 0.822378 |   |
| NHL67171.1            | bifunctional phosphopantetheinylcysteine decarboxylase/phosphopantetheinyl-cysteine ligase | 0.822161 |   |
| NHL70190.1            | OsmC family protein                                                                        | 0.817431 |   |
| NHL70049.1            | glutathione S-transferase                                                                  | 0.81305  | + |
| NHL70497.1            | phosphopantetheine-binding protein                                                         | 0.812286 |   |
| NHL65110.1            | transposase                                                                                | 0.811846 | + |
| NHL65256.1            | UDP-N-acetylmuramoyl-L-alanine--D-glutamate ligase                                         | 0.806209 |   |
| NHL67588.1            | 8-amino-7-oxononanoate synthase                                                            | 0.803989 |   |
| NHL65716.1            | prephenate dehydrogenase/arginate dehydrogenase family protein                             | 0.803286 |   |
| NHL67474.1            | maleylacetoacetate isomerase                                                               | 0.80139  |   |
| NHL66692.1            | glutathione peroxidase                                                                     | 0.79817  |   |
| NHL66442.1            | hypothetical protein EIB72_08590                                                           | 0.796132 |   |
| NHL65104.1            | sn-glycerol-3-phosphate ABC transporter substrate-binding protein UgpB                     | 0.795534 | + |
| NHL66898.1            | pimeloyl-CoA dehydrogenase small subunit                                                   | 0.795148 | + |
| NHL67731.1            | L-glyceraldehyde 3-phosphate reductase                                                     | 0.794374 | + |
| NHL69456.1            | SDR family NAD(P)-dependent oxidoreductase                                                 | 0.791907 |   |
| NHL69820.1            | acetyl/propionyl/methylcrotonyl-CoA carboxylase subunit alpha                              | 0.787162 | + |
| NHL65823.1            | GAF domain-containing protein                                                              | 0.785806 |   |
| NHL66859.1;NHL70605.1 | acetate--CoA ligase                                                                        | 0.781846 | + |
| NHL65629.1            | DUF1993 domain-containing protein                                                          | 0.773422 | + |
| NHL69002.1            | NAD-dependent succinate-semialdehyde dehydrogenase                                         | 0.771677 | + |
| NHL67987.1            | cupin domain-containing protein                                                            | 0.769646 |   |
| NHL65026.1            | flavodoxin family protein                                                                  | 0.767852 | + |
| NHL69661.1            | hypothetical protein EIB72_25120                                                           | 0.766486 |   |
| NHL66495.1            | thioredoxin TrxA                                                                           | 0.765495 | + |
| NHL70444.1            | dienelactone hydrolase family protein                                                      | 0.757029 | + |
| NHL66456.1            | acetyl-CoA C-acetyltransferase                                                             | 0.754183 | + |
| NHL66383.1            | Laci family DNA-binding transcriptional regulator                                          | 0.752158 |   |
| NHL68497.1            | NADP-dependent phosphogluconate dehydrogenase                                              | 0.743765 | + |
| NHL65687.1            | aminopeptidase N                                                                           | 0.742638 | + |
| NHL66105.1            | HlyD family secretion protein                                                              | 0.742208 |   |
| NHL68856.1            | MOSC domain-containing protein                                                             | 0.739541 |   |
| NHL69290.1            | ABC transporter substrate-binding protein                                                  | 0.732824 |   |
| NHL65124.1            | ABC transporter substrate-binding protein                                                  | 0.728377 | + |
| NHL67938.1            | acyl-CoA dehydrogenase                                                                     | 0.721736 |   |
| NHL68722.1            | phosphonopyruvate decarboxylase                                                            | 0.719721 |   |
| NHL71065.1            | sigma-54-dependent Fis family transcriptional regulator                                    | 0.71828  |   |
| NHL65520.1            | 2-hydroxyacid dehydrogenase                                                                | 0.717461 |   |
| NHL65225.1            | UbiH/UbiF family hydroxylase                                                               | 0.714683 |   |
| NHL67184.1            | elongation factor G                                                                        | 0.710492 | + |
| NHL67745.1            | ATP-dependent protease subunit HslV                                                        | 0.71017  | + |
| NHL65392.1            | FMN-binding glutamate synthase family protein                                              | 0.708843 |   |
| NHL66260.1            | sugar ABC transporter substrate-binding protein                                            | 0.7075   |   |
| NHL67267.1            | efflux RND transporter periplasmic adaptor subunit                                         | 0.703634 | + |
| NHL65178.1            | type VI secretion system tube protein Hcp                                                  | 0.701544 |   |
| NHL67471.1            | pantetheine-phosphate adenylyltransferase                                                  | 0.696357 |   |
| NHL66806.1            | exodeoxyribonuclease III                                                                   | 0.694358 |   |

|                       |                                                                                         |          |   |
|-----------------------|-----------------------------------------------------------------------------------------|----------|---|
| NHL64987.1            | branched-chain amino acid ABC transporter substrate-binding protein                     | 0.69343  | + |
| NHL66201.1            | ABC transporter substrate-binding protein                                               | 0.689959 | + |
| NHL65096.1            | iron donor protein CyaY                                                                 | 0.68987  | + |
| NHL67230.1            | peptide-methionine (S)-S-oxide reductase MsrA                                           | 0.68798  | + |
| NHL65943.1            | glutathione S-transferase                                                               | 0.68788  |   |
| NHL65137.1            | imidazole glycerol phosphate synthase subunit HisF                                      | 0.686556 |   |
| NHL68906.1            | 2,4-dihydroxyacetophenone dioxygenase                                                   | 0.684067 |   |
| NHL68133.1            | cyclic di-GMP phosphodiesterase                                                         | 0.673603 |   |
| NHL71100.1            | type VI secretion system tip protein VgrG                                               | 0.673267 |   |
| NHL69161.1            | glutamate/aspartate ABC transporter substrate-binding protein                           | 0.672281 |   |
| NHL67151.1            | ABC transporter ATP-binding protein                                                     | 0.670457 |   |
| NHL69403.1            | transcription elongation factor GreAB                                                   | 0.670398 |   |
| NHL67550.1            | alpha/beta hydrolase                                                                    | 0.669722 |   |
| NHL66414.1            | aldehyde dehydrogenase family protein                                                   | 0.667632 |   |
| NHL65700.1            | tetratricopeptide repeat protein                                                        | 0.666366 |   |
| NHL70999.1            | NAD(P)-dependent alcohol dehydrogenase                                                  | 0.66386  |   |
| NHL66744.1            | RNA methyltransferase                                                                   | 0.662439 |   |
| NHL65357.1            | bifunctional 4-hydroxy-2-oxoglutarate aldolase/2-dehydro-3-deoxy-phosphogluconate       | 0.662126 | + |
| NHL65273.1            | dephospho-CoA kinase                                                                    | 0.661343 | + |
| NHL64844.1            | type II secretion system ATPase GspE                                                    | 0.660074 |   |
| NHL64881.1            | FOF1 ATP synthase subunit A                                                             | 0.657068 |   |
| NHL64957.1            | H-NS histone family protein                                                             | 0.654794 |   |
| NHL67122.1            | DUF2486 family protein                                                                  | 0.654097 |   |
| NHL67894.1            | 3-oxoadipate enol-lactonase                                                             | 0.647717 |   |
| NHL70881.1            | glycosyltransferase family 25 protein                                                   | 0.640355 | + |
| NHL66614.1            | carboxymuconolactone decarboxylase family protein                                       | 0.637697 |   |
| NHL69875.1            | peptidase S1                                                                            | 0.636969 |   |
| NHL67334.1            | gamma-glutamyltransferase family protein                                                | 0.635982 |   |
| NHL64857.1            | response regulator transcription factor                                                 | 0.63534  | + |
| NHL70885.1            | MBL fold metallo-hydrolase                                                              | 0.626403 |   |
| NHL65103.1            | deoxyguanosinetriphosphate triphosphohydrolase                                          | 0.625925 |   |
| NHL65108.1            | glycerophosphodiester phosphodiesterase                                                 | 0.62522  |   |
| NHL67803.1            | phosphonate utilization associated transcriptional regulator                            | 0.624117 |   |
| NHL66513.1            | ATP-dependent chaperone ClpB                                                            | 0.623187 | + |
| NHL64992.1            | Lrp/AsnC family transcriptional regulator                                               | 0.620548 |   |
| NHL67487.1            | SIS domain-containing protein                                                           | 0.618606 |   |
| NHL68618.1            | antibiotic biosynthesis monooxygenase                                                   | 0.61244  |   |
| NHL69822.1            | methylcrotonoyl-CoA carboxylase                                                         | 0.610435 |   |
| NHL65374.1            | hypothetical protein EIB72_03065                                                        | 0.610241 |   |
| NHL66613.1            | peroxiredoxin                                                                           | 0.609943 | + |
| NHL67208.1            | tetratricopeptide repeat protein                                                        | 0.609455 |   |
| NHL66634.1            | allantoinase PuuE                                                                       | 0.605169 |   |
| NHL67451.1            | HAD family hydrolase                                                                    | 0.604417 |   |
| NHL69325.1            | ATP-binding domain-containing protein                                                   | 0.602269 |   |
| NHL66474.1            | RNA chaperone Hfq                                                                       | 0.60166  | + |
| NHL68960.1            | universal stress protein                                                                | 0.5991   |   |
| NHL67520.1            | molybdopterin-synthase adenylyltransferase MoeB                                         | 0.59763  |   |
| NHL65789.1            | DUF177 domain-containing protein                                                        | 0.597295 |   |
| NHL67818.1            | tRNA uridine-5-carboxymethylaminomethyl(34) synthesis GTPase MnmE                       | 0.596999 |   |
| NHL67124.1            | leucyl aminopeptidase                                                                   | 0.595577 | + |
| NHL66128.1;NHL70936.1 | CoA transferase subunit A                                                               | 0.593249 |   |
| NHL65356.1            | phosphogluconate dehydratase                                                            | 0.592736 |   |
| NHL69935.1            | LysR family transcriptional regulator                                                   | 0.591894 |   |
| NHL66576.1            | acetyl-CoA C-acyltransferase                                                            | 0.59132  |   |
| NHL66998.1            | MoxR family ATPase                                                                      | 0.590656 | + |
| NHL70498.1            | chlorinating enzyme                                                                     | 0.590124 | + |
| NHL64990.1            | H-NS histone family protein                                                             | 0.588321 |   |
| NHL64926.1            | glycine cleavage system protein GcvH                                                    | 0.586657 |   |
| NHL66281.1            | molecular chaperone                                                                     | 0.583934 |   |
| NHL65627.1            | 6,7-dimethyl-8-ribityllumazine synthase                                                 | 0.583464 |   |
| NHL66640.1            | DUF1992 domain-containing protein                                                       | 0.582496 |   |
| NHL66220.1            | enoyl-CoA hydratase/isomerase family protein                                            | 0.581801 |   |
| NHL66955.1            | quinone oxidoreductase                                                                  | 0.581153 |   |
| NHL65830.1            | trehalose-phosphatase                                                                   | 0.579094 |   |
| NHL70123.1            | cupin domain-containing protein                                                         | 0.57666  |   |
| NHL66611.1            | two-component system response regulator OmpR                                            | 0.575678 | + |
| NHL68390.1            | OsmC family protein                                                                     | 0.571621 |   |
| NHL67097.1            | DUF3460 family protein                                                                  | 0.570415 |   |
| NHL65196.1            | class I SAM-dependent methyltransferase                                                 | 0.568356 |   |
| NHL69401.1            | CBS domain-containing protein                                                           | 0.567722 |   |
| NHL66583.1            | BoIA family transcriptional regulator                                                   | 0.567639 |   |
| NHL67863.1            | hypothetical protein EIB72_15900                                                        | 0.566806 |   |
| NHL68518.1            | bifunctional 2-methylcitrate dehydratase/aconitate hydratase                            | 0.56423  |   |
| NHL67446.1            | DUF4743 domain-containing protein                                                       | 0.563692 |   |
| NHL65507.1            | DUF883 domain-containing protein                                                        | 0.562731 |   |
| NHL67515.1            | protein-export chaperone SecB                                                           | 0.561958 |   |
| NHL69552.1            | hypothetical protein EIB72_24560                                                        | 0.561661 |   |
| NHL70406.1            | alpha/beta hydrolase                                                                    | 0.558993 |   |
| NHL67176.1            | cold-shock protein                                                                      | 0.554025 |   |
| NHL65142.1            | Sec-independent protein translocase subunit Tata                                        | 0.551369 |   |
| NHL69914.1            | 5-dehydro-4-deoxyglucarate dehydratase                                                  | 0.549973 |   |
| NHL65241.1            | 2-(1,2-epoxy-1,2-dihydrophenyl)acetyl-CoA isomerase                                     | 0.548491 |   |
| NHL67001.1            | transaldolase                                                                           | 0.547844 | + |
| NHL67659.1            | glutathione-disulfide reductase                                                         | 0.544897 | + |
| NHL66561.1            | NRDE family protein                                                                     | 0.543734 |   |
| NHL68468.1            | NAD(P)/FAD-dependent oxidoreductase                                                     | 0.541695 | + |
| NHL66625.1            | NAD(P)-dependent oxidoreductase                                                         | 0.540616 | + |
| NHL66546.1            | peptidoglycan-binding protein LysM                                                      | 0.539874 |   |
| NHL69400.1            | GTP cyclohydrolase II                                                                   | 0.539249 |   |
| NHL70115.1            | hypothetical protein EIB72_27435                                                        | 0.535873 |   |
| NHL69973.1            | Rieske 2Fe-2S domain-containing protein                                                 | 0.534189 |   |
| NHL68469.1            | 30S ribosomal protein S21                                                               | 0.534031 |   |
| NHL70481.1            | dihydroxyacetone kinase subunit Dhak                                                    | 0.53223  | + |
| NHL68721.1            | 2-aminoethylphosphonate aminotransferase                                                | 0.530941 | + |
| NHL66332.1            | glutathione S-transferase                                                               | 0.529807 |   |
| NHL67025.1            | DUF4399 domain-containing protein                                                       | 0.529423 |   |
| NHL66183.1            | CpaF family protein                                                                     | 0.529236 |   |
| NHL65445.1            | bifunctional anthranilate synthase component I family protein/class IV aminotransferase | 0.528233 |   |

|            |                                                                                       |          |   |
|------------|---------------------------------------------------------------------------------------|----------|---|
| NHL67691.1 | 5-oxoprolinase subunit PxpB                                                           | 0.526733 |   |
| NHL65517.1 | fumarylacetoacetase                                                                   | 0.525132 |   |
| NHL70222.1 | NAD(P)H-dependent oxidoreductase                                                      | 0.524754 |   |
| NHL65427.1 | NO-inducible flavohemoprotein                                                         | 0.521289 |   |
| NHL66286.1 | TauD/TfA family dioxygenase                                                           | 0.518872 |   |
| NHL68527.1 | succinate dehydrogenase assembly factor 2                                             | 0.518597 |   |
| NHL66493.1 | YbaB/Ebfc family nucleoid-associated protein                                          | 0.515059 |   |
| NHL66012.1 | FadR family transcriptional regulator                                                 | 0.513286 |   |
| NHL67573.1 | DUF1840 domain-containing protein                                                     | 0.513131 |   |
| NHL69970.1 | tryptophan 7-halogenase                                                               | 0.512232 |   |
| NHL65146.1 | Nif3-like dinuclear metal center hexameric protein                                    | 0.510902 |   |
| NHL67726.1 | serine/threonine protein kinase                                                       | 0.503579 |   |
| NHL68940.1 | aspartate/tyrosine/aromatic aminotransferase                                          | 0.500905 |   |
| NHL65153.1 | cystine ABC transporter substrate-binding protein                                     | 0.497312 | + |
| NHL64867.1 | ABC transporter substrate-binding protein                                             | 0.495896 |   |
| NHL65637.1 | glucose-6-phosphate dehydrogenase                                                     | 0.494884 |   |
| NHL66379.1 | Spy/CpxP family protein refolding chaperone                                           | 0.494778 |   |
| NHL67966.1 | peptide ABC transporter ATPase                                                        | 0.494275 |   |
| NHL67199.1 | DUF3380 domain-containing protein                                                     | 0.493455 |   |
| NHL70499.1 | acyl carrier protein                                                                  | 0.491154 |   |
| NHL66709.1 | malate synthase A                                                                     | 0.490989 |   |
| NHL66246.1 | tRNA 2-selenouridine(34) synthase MnmH                                                | 0.489621 |   |
| NHL66999.1 | VWA domain-containing protein                                                         | 0.489319 |   |
| NHL65456.1 | tRNA (adenosine(37)-N6)-dimethylallyltransferase MiaA                                 | 0.486965 |   |
| NHL70874.1 | OsmC family protein                                                                   | 0.485847 |   |
| NHL67711.1 | XdhC family protein                                                                   | 0.485643 |   |
| NHL68459.1 | dienelactone hydrolase family protein                                                 | 0.484833 |   |
| NHL69353.1 | NAD-glutamate dehydrogenase                                                           | 0.48465  |   |
| NHL68144.1 | isocitrate lyase/phosphoenolpyruvate mutase family protein                            | 0.483954 |   |
| NHL66595.1 | ATP-dependent Clp endopeptidase proteolytic subunit ClpP                              | 0.482777 | + |
| NHL70495.1 | succinylglutamate desuccinylase                                                       | 0.482595 |   |
| NHL67200.1 | type VI secretion system tip protein VgrG                                             | 0.482047 |   |
| NHL69000.1 | xanthine dehydrogenase family protein molybdopterin-binding subunit                   | 0.479136 |   |
| NHL71002.1 | HAD family hydrolase                                                                  | 0.477736 |   |
| NHL67965.1 | fucose-binding lectin II                                                              | 0.476523 |   |
| NHL67746.1 | ATP-dependent protease ATPase subunit HslU                                            | 0.476189 | + |
| NHL70047.1 | HIT domain-containing protein                                                         | 0.476026 |   |
| NHL67166.1 | RsmB/NOP family class I SAM-dependent RNA methyltransferase                           | 0.475195 |   |
| NHL65365.1 | glutamate/aspartate ABC transporter substrate-binding protein                         | 0.47475  |   |
| NHL65893.1 | pentapeptide MXKDX repeat protein                                                     | 0.472959 |   |
| NHL66292.1 | amino acid adenylation domain-containing protein                                      | 0.471443 |   |
| NHL65198.1 | DUF1415 domain-containing protein                                                     | 0.470397 |   |
| NHL65826.1 | GNAT family N-acetyltransferase                                                       | 0.46919  |   |
| NHL68161.1 | hsp70 family protein                                                                  | 0.468896 |   |
| NHL70424.1 | ATPase                                                                                | 0.46866  |   |
| NHL65950.1 | hydroxyacylglutathione hydrolase                                                      | 0.468624 |   |
| NHL67615.1 | glyoxylate/hydroxypropyruvate reductase A                                             | 0.468273 |   |
| NHL65380.1 | D-tyrosyl-tRNA(Tyr) deacylase                                                         | 0.467927 |   |
| NHL66705.1 | isocitrate lyase                                                                      | 0.460974 |   |
| NHL67475.1 | DNA-binding protein YbiB                                                              | 0.459962 |   |
| NHL66518.1 | molybdopterin molybdotransferase MoeA                                                 | 0.459037 |   |
| NHL69295.1 | ABC transporter substrate-binding protein                                             | 0.458761 |   |
| NHL66266.1 | PrkA family serine protein kinase                                                     | 0.458455 | + |
| NHL70890.1 | diaminobutyrate--2-oxoglutarate transaminase family protein                           | 0.457332 |   |
| NHL68724.1 | phosphocholine cytidylyltransferase family protein                                    | 0.456259 |   |
| NHL67788.1 | thioredoxin family protein                                                            | 0.456153 |   |
| NHL66581.1 | peptide-methionine (R)-S-oxide reductase MsrB                                         | 0.456136 |   |
| NHL66962.1 | nicotinate-nucleotide adenyltransferase                                               | 0.453728 |   |
| NHL67739.1 | diaminopimelate epimerase                                                             | 0.452986 | + |
| NHL67387.1 | dihydroneopterin triphosphate diphosphatase                                           | 0.450181 |   |
| NHL65093.1 | protein-methionine-sulfoxide reductase catalytic subunit MsrP                         | 0.44958  |   |
| NHL65432.1 | carbon-nitrogen hydrolase family protein                                              | 0.448197 |   |
| NHL67201.1 | superoxide dismutase                                                                  | 0.448188 |   |
| NHL65638.1 | carbohydrate ABC transporter substrate-binding protein                                | 0.444565 | + |
| NHL65434.1 | bifunctional                                                                          | 0.444553 |   |
| NHL65548.1 | co-chaperone GroES                                                                    | 0.443324 |   |
| NHL69910.1 | ribose ABC transporter                                                                | 0.442115 |   |
| NHL68387.1 | riboflavin synthase subunit alpha                                                     | 0.441957 | + |
| NHL69107.1 | fumarylacetoacetate hydrolase family protein                                          | 0.438054 |   |
| NHL66144.1 | MerR family transcriptional regulator                                                 | 0.437874 |   |
| NHL66680.1 | pseudouridine synthase                                                                | 0.437737 |   |
| NHL68927.1 | 3-keto-5-aminohexanoate cleavage protein                                              | 0.437695 |   |
| NHL65443.1 | molecular chaperone DnaK                                                              | 0.434821 | + |
| NHL70064.1 | IcIR family transcriptional regulator                                                 | 0.434196 |   |
| NHL65429.1 | type II toxin-antitoxin system Phd/YefM family antitoxin                              | 0.433247 |   |
| NHL69042.1 | alpha, alpha-trehalose-phosphate synthase (UDP-forming)                               | 0.428503 |   |
| NHL67469.1 | histidinol-phosphate transaminase                                                     | 0.427441 |   |
| NHL65711.1 | OmpA family protein                                                                   | 0.425616 |   |
| NHL65245.1 | molybdopterin oxidoreductase family protein                                           | 0.425252 |   |
| NHL69044.1 | acid phosphatase                                                                      | 0.422439 |   |
| NHL65695.1 | amidase                                                                               | 0.416358 |   |
| NHL66580.1 | YdiU family protein                                                                   | 0.415556 |   |
| NHL67456.1 | ribosome-associated translation inhibitor RaiA                                        | 0.412403 |   |
| NHL67305.1 | succinate--CoA ligase subunit alpha                                                   | 0.412393 |   |
| NHL69399.1 | hypothetical protein EIB72_23785                                                      | 0.409712 |   |
| NHL67261.1 | S-formylglutathione hydrolase                                                         | 0.409259 | + |
| NHL65772.1 | nicotinate phosphoribosyltransferase                                                  | 0.407604 |   |
| NHL66598.1 | MarR family transcriptional regulator                                                 | 0.406848 |   |
| NHL65064.1 | 30S ribosomal protein S3                                                              | 0.406796 |   |
| NHL65798.1 | RNA polymerase sigma factor RpoE                                                      | 0.402394 |   |
| NHL65049.1 | 50S ribosomal protein L7/L12                                                          | 0.40085  |   |
| NHL69874.1 | ammonia-dependent NAD(+) synthetase                                                   | 0.399776 |   |
| NHL67547.1 | YbeD family protein                                                                   | 0.399127 |   |
| NHL69971.1 | DUF1864 family protein                                                                | 0.394388 |   |
| NHL67257.1 | transcriptional repressor                                                             | 0.393841 |   |
| NHL67210.1 | 30S ribosomal protein S20                                                             | 0.393765 |   |
| NHL65710.1 | bifunctional 2-polyprenyl-6-hydroxyphenol methylase/3-demethylubiquinol 3-O-methylase | 0.392649 |   |
| NHL65750.1 | oligoribonuclease                                                                     | 0.390441 |   |

|            |                                                                                         |          |   |
|------------|-----------------------------------------------------------------------------------------|----------|---|
| NHL67394.1 | Tim44 domain-containing protein                                                         | 0.389902 |   |
| NHL65630.1 | riboflavin synthase                                                                     | 0.388119 |   |
| NHL69397.1 | hypothetical protein EIB72_23775                                                        | 0.388105 |   |
| NHL65474.1 | capsular biosynthesis protein                                                           | 0.387922 |   |
| NHL67219.1 | methylated-DNA-[protein]-cysteine S-methyltransferase                                   | 0.387795 |   |
| NHL65132.1 | histidinol-phosphate transaminase                                                       | 0.386084 |   |
| NHL66156.1 | SMC-Scp complex subunit ScpB                                                            | 0.384501 |   |
| NHL67207.1 | SDR family NAD(P)-dependent oxidoreductase                                              | 0.383081 |   |
| NHL68852.1 | response regulator                                                                      | 0.38299  |   |
| NHL70880.1 | hypothetical protein EIB72_31385                                                        | 0.382779 |   |
| NHL69557.1 | DUF1311 domain-containing protein                                                       | 0.38231  |   |
| NHL65128.1 | BoIA family transcriptional regulator                                                   | 0.380705 |   |
| NHL66530.1 | peroxiredoxin                                                                           | 0.379444 |   |
| NHL67685.1 | multifunctional CCA addition/repair protein                                             | 0.378412 |   |
| NHL66781.1 | Fe-S cluster assembly protein IscX                                                      | 0.377099 |   |
| NHL67591.1 | copper homeostasis protein CutC                                                         | 0.375401 |   |
| NHL67298.1 | hypothetical protein EIB72_13035                                                        | 0.374235 |   |
| NHL66313.1 | DUF1993 domain-containing protein                                                       | 0.373534 |   |
| NHL69422.1 | SDR family oxidoreductase                                                               | 0.37311  |   |
| NHL70891.1 | SDR family oxidoreductase                                                               | 0.372441 |   |
| NHL68205.1 | LysR family transcriptional regulator                                                   | 0.371342 |   |
| NHL65981.1 | DUF2288 domain-containing protein                                                       | 0.370471 |   |
| NHL64855.1 | SET domain-containing protein-lysine N-methyltransferase                                | 0.36954  |   |
| NHL65176.1 | type VI secretion system contractile sheath small subunit                               | 0.369334 | + |
| NHL70264.1 | cold-shock protein                                                                      | 0.368832 |   |
| NHL67450.1 | KpsF/GutQ family sugar-phosphate isomerase                                              | 0.368118 |   |
| NHL70535.1 | SDR family oxidoreductase                                                               | 0.366969 |   |
| NHL68464.1 | 1-deoxy-D-xylulose 5-phosphate synthase                                                 | 0.365613 | + |
| NHL66407.1 | polyamine ABC transporter substrate-binding protein                                     | 0.360619 |   |
| NHL65697.1 | type 1 glutamine amidotransferase                                                       | 0.358919 |   |
| NHL66527.1 | formyltransferase                                                                       | 0.355216 |   |
| NHL70501.1 | alpha/beta hydrolase                                                                    | 0.354952 |   |
| NHL67116.1 | EVE domain-containing protein                                                           | 0.35495  |   |
| NHL65960.1 | ATP-dependent metalloproteinase FtsH/Yme1/Tma family protein                            | 0.351354 |   |
| NHL69569.1 | M20/M25/M40 family metallo-hydrolase                                                    | 0.350537 |   |
| NHL69428.1 | alkene reductase                                                                        | 0.348938 |   |
| NHL69594.1 | response regulator                                                                      | 0.34547  |   |
| NHL65177.1 | type VI secretion system contractile sheath large subunit                               | 0.343526 |   |
| NHL66298.1 | acetyltransferase                                                                       | 0.341384 |   |
| NHL66117.1 | CBS domain-containing protein                                                           | 0.341087 |   |
| NHL66373.1 | YciI family protein                                                                     | 0.341084 |   |
| NHL68661.1 | DUF2891 domain-containing protein                                                       | 0.338605 |   |
| NHL65201.1 | nitroreductase family protein                                                           | 0.33847  |   |
| NHL70413.1 | dihydropyrimidinase                                                                     | 0.338162 |   |
| NHL65450.1 | HAD-IB family hydrolase                                                                 | 0.336301 |   |
| NHL69323.1 | hypothetical protein EIB72_23405                                                        | 0.335476 |   |
| NHL68589.1 | L-seryl-tRNA(Sec) selenium transferase                                                  | 0.331626 |   |
| NHL67453.1 | lipopolysaccharide transport periplasmic protein LptA                                   | 0.329878 |   |
| NHL66119.1 | chorismate synthase                                                                     | 0.32931  |   |
| NHL65320.1 | arabinose ABC transporter substrate-binding protein                                     | 0.327464 |   |
| NHL69851.1 | WG repeat-containing protein                                                            | 0.327122 |   |
| NHL66893.1 | glutathione S-transferase                                                               | 0.326604 |   |
| NHL67177.1 | multicopper oxidase family protein                                                      | 0.32615  |   |
| NHL67457.1 | PTS transporter subunit EIIA                                                            | 0.325615 |   |
| NHL66761.1 | PHP domain-containing protein                                                           | 0.321925 |   |
| NHL66713.1 | glutamate-tRNA ligase                                                                   | 0.321131 |   |
| NHL65133.1 | imidazoleglycerol-phosphate dehydratase HisB                                            | 0.318876 |   |
| NHL65187.1 | OmpA family protein                                                                     | 0.317052 |   |
| NHL66587.1 | FAD-dependent oxidoreductase                                                            | 0.316886 |   |
| NHL67359.1 | CBS domain-containing protein                                                           | 0.314868 |   |
| NHL66251.1 | universal stress protein                                                                | 0.313405 |   |
| NHL71085.1 | Dyp-type peroxidase                                                                     | 0.310095 |   |
| NHL66929.1 | acetolactate synthase small subunit                                                     | 0.309961 |   |
| NHL67402.1 | RidA family protein                                                                     | 0.307182 |   |
| NHL67838.1 | replication initiation protein                                                          | 0.306314 |   |
| NHL65139.1 | phosphoribosyl-ATP diphosphatase                                                        | 0.306089 |   |
| NHL65390.1 | M24 family metalloproteinase                                                            | 0.303809 | + |
| NHL69175.1 | hypothetical protein EIB72_22615                                                        | 0.302703 |   |
| NHL65655.1 | cell division topological specificity factor MinE                                       | 0.302237 |   |
| NHL70682.1 | hypothetical protein EIB72_30365                                                        | 0.299422 |   |
| NHL67115.1 | cell division protein ZapA                                                              | 0.299292 |   |
| NHL68526.1 | succinate dehydrogenase iron-sulfur subunit                                             | 0.299194 |   |
| NHL64858.1 | DUF3717 domain-containing protein                                                       | 0.296327 |   |
| NHL69337.1 | agmatinase                                                                              | 0.295404 |   |
| NHL67306.1 | ADP-forming succinate-CoA ligase subunit beta                                           | 0.292341 |   |
| NHL67002.1 | VOG family protein                                                                      | 0.291141 |   |
| NHL65448.1 | 2-amino-4-hydroxy-6-hydroxymethylidihydropteridine diphosphokinase                      | 0.290876 |   |
| NHL68003.1 | molybdopterin-dependent oxidoreductase                                                  | 0.29051  |   |
| NHL65664.1 | oxygen-independent coproporphyrinogen III oxidase-like protein                          | 0.289202 |   |
| NHL65309.1 | UDP-N-acetylmuramate:L-alanyl-gamma-D-glutamyl-meso-diaminopimelate ligase              | 0.287451 |   |
| NHL67847.1 | tartrate dehydrogenase                                                                  | 0.285404 |   |
| NHL64914.1 | aldehyde dehydrogenase                                                                  | 0.283196 |   |
| NHL65729.1 | histone deacetylase family protein                                                      | 0.282412 |   |
| NHL67100.1 | aspartate 1-decarboxylase                                                               | 0.282392 |   |
| NHL65555.1 | bifunctional pyr operon transcriptional regulator/uracil phosphoribosyltransferase PyrR | 0.281862 |   |
| NHL66679.1 | [protein-Pil] uridylyltransferase                                                       | 0.280638 |   |
| NHL64929.1 | oxidoreductase                                                                          | 0.279811 |   |
| NHL70882.1 | amino acid adenylation domain-containing protein                                        | 0.279195 |   |
| NHL70338.1 | Flp pilus assembly complex ATPase component TadA                                        | 0.278358 |   |
| NHL67312.1 | MHS family MFS transporter                                                              | 0.277201 |   |
| NHL69691.1 | alanine-glyoxylate aminotransferase family protein                                      | 0.27702  |   |
| NHL68528.1 | citrate (5i)-synthase                                                                   | 0.275904 |   |
| NHL64963.1 | response regulator                                                                      | 0.274974 |   |
| NHL65305.1 | acetyl-CoA carboxylase biotin carboxyl carrier protein                                  | 0.274576 |   |
| NHL69149.1 | alpha-2-macroglobulin                                                                   | 0.27414  |   |
| NHL66817.1 | amino-acid N-acetyltransferase                                                          | 0.273637 |   |
| NHL67463.1 | tetratricopeptide repeat protein                                                        | 0.272449 | + |
| NHL65628.1 | 3,4-dihydroxy-2-butanone-4-phosphate synthase                                           | 0.269809 |   |

|                       |                                                                                                   |          |
|-----------------------|---------------------------------------------------------------------------------------------------|----------|
| NHL67317.1            | PAAR domain-containing protein                                                                    | 0.269129 |
| NHL66881.1            | 23S rRNA (adenine(2030)-N(6))-methyltransferase RlmJ                                              | 0.268496 |
| NHL65242.1            | 3-oxoadipyl-CoA thiolase                                                                          | 0.266624 |
| NHL68776.1            | gamma-glutamyltransferase                                                                         | 0.264658 |
| NHL67227.1            | pyridoxamine 5-phosphate oxidase                                                                  | 0.264402 |
| NHL64924.1            | alginate lyase family protein                                                                     | 0.264261 |
| NHL67568.1            | IcIR family transcriptional regulator                                                             | 0.262347 |
| NHL66566.1            | Dabb family protein                                                                               | 0.261724 |
| NHL68902.1            | MBL fold metallo-hydrolase                                                                        | 0.261173 |
| NHL65631.1            | bifunctional diaminohydroxyphosphoribosylaminopyrimidine deaminase                                | 0.260308 |
| NHL69972.1            | FAD-dependent oxidoreductase                                                                      | 0.260244 |
| NHL64887.1            | FOF1 ATP synthase subunit beta                                                                    | 0.258701 |
| NHL67290.1            | zinc-finger domain-containing protein                                                             | 0.257424 |
| NHL66112.1            | FAD-binding oxidoreductase                                                                        | 0.254045 |
| NHL69568.1            | malate/lactate/ureidoglycolate dehydrogenase                                                      | 0.253951 |
| NHL69596.1            | transcription elongation factor GreA                                                              | 0.253347 |
| NHL68456.1            | TIGR00730 family Rossmann fold protein                                                            | 0.252668 |
| NHL69962.1            | 3-oxoadipyl-CoA thiolase                                                                          | 0.25243  |
| NHL65067.1            | 30S ribosomal protein S17                                                                         | 0.251847 |
| NHL65796.1            | beta-ketoacyl-ACP synthase II                                                                     | 0.251695 |
| NHL65632.1            | glutamate-1-semialdehyde 2,1-aminomutase                                                          | 0.251616 |
| NHL65837.1            | FadR family transcriptional regulator                                                             | 0.250915 |
| NHL64848.1            | HU family DNA-binding protein                                                                     | 0.250429 |
| NHL66467.1            | phosphoribosyltransferase                                                                         | 0.250266 |
| NHL65984.1            | aldose epimerase                                                                                  | 0.2502   |
| NHL66900.1            | NUDIX hydrolase                                                                                   | 0.249992 |
| NHL70215.1            | presqualene diphosphate synthase HpnD                                                             | 0.249349 |
| NHL70209.1            | ABC transporter substrate-binding protein                                                         | 0.246847 |
| NHL67098.1            | segregation/condensation protein A                                                                | 0.246259 |
| NHL67460.1            | ATP-dependent protease                                                                            | 0.246122 |
| NHL70147.1            | 3-deoxy-7-phosphoheptulonate synthase                                                             | 0.245253 |
| NHL67078.1            | class I SAM-dependent methyltransferase                                                           | 0.244428 |
| NHL69953.1            | selenide, water dikinase Seld                                                                     | 0.242696 |
| NHL65735.1            | electron transfer flavoprotein subunit alpha/FixB family protein                                  | 0.2415   |
| NHL70427.1            | AAA family ATPase                                                                                 | 0.241269 |
| NHL65136.1            | 1-(5-phosphoribosyl)-5-[(5-phosphoribosylamino)methylideneamino]imidazole-4-carboxamide isomerase | 0.241086 |
| NHL65801.1            | DegQ family serine endoprotease                                                                   | 0.241024 |
| NHL65557.1            | dihydroorotase                                                                                    | 0.240445 |
| NHL67779.1            | response regulator                                                                                | 0.240335 |
| NHL65281.1            | GTPase ObgE                                                                                       | 0.236167 |
| NHL65181.1            | type VI secretion system baseplate subunit TssG                                                   | 0.232636 |
| NHL64934.1            | DUF3396 domain-containing protein                                                                 | 0.23222  |
| NHL66242.1            | NADP(H)-dependent aldo-keto reductase                                                             | 0.231487 |
| NHL68999.1            | (2Fe-2S)-binding protein                                                                          | 0.230346 |
| NHL68565.1            | bifunctional tetrahydrofolate synthase/dihydrofolate synthase                                     | 0.230334 |
| NHL66615.1            | 2-C-methyl-D-erythritol 2,4-cyclodiphosphate synthase                                             | 0.229464 |
| NHL67277.1            | D-alanyl-D-alanine carboxypeptidase/D-alanyl-D-alanine-endopeptidase                              | 0.228546 |
| NHL67699.1            | ABC transporter substrate-binding protein                                                         | 0.227846 |
| NHL66667.1            | UDP-3-O-(3-hydroxymyristoyl)glucosamine N-acyltransferase                                         | 0.226618 |
| NHL65207.1            | Grx4 family monothiol glutaredoxin                                                                | 0.226484 |
| NHL69549.1            | adenosylmethionine decarboxylase                                                                  | 0.22612  |
| NHL70507.1            | branched-chain amino acid ABC transporter substrate-binding protein                               | 0.224932 |
| NHL66638.1            | muramoyltetrapeptide carboxypeptidase                                                             | 0.224425 |
| NHL70053.1            | trans-2-enoyl-CoA reductase family protein                                                        | 0.222809 |
| NHL67101.1            | ParA family protein                                                                               | 0.221471 |
| NHL68424.1            | FKBP-type peptidyl-prolyl cis-trans isomerase                                                     | 0.220916 |
| NHL67525.1            | glutamate-cysteine ligase                                                                         | 0.220885 |
| NHL67088.1            | dCTP deaminase                                                                                    | 0.220234 |
| NHL66703.1            | acyl-CoA-binding protein                                                                          | 0.217871 |
| NHL65666.1            | ribonuclease PH                                                                                   | 0.216099 |
| NHL66911.1            | NADH-quinone oxidoreductase subunit NuoE                                                          | 0.215361 |
| NHL66938.1            | TetR/AcrR family transcriptional regulator                                                        | 0.214675 |
| NHL65301.1            | thiol peroxidase                                                                                  | 0.210206 |
| NHL65795.1            | acyl carrier protein                                                                              | 0.209293 |
| NHL65248.1            | 2-polyprenyl-3-methyl-6-methoxy-1,4-benzoquinone monooxygenase                                    | 0.207728 |
| NHL66802.1            | M3 family metalloprotease                                                                         | 0.206671 |
| NHL67405.1            | amino acid deaminase                                                                              | 0.205938 |
| NHL67544.1            | lipoyl(octanoyl) transferase LipB                                                                 | 0.205514 |
| NHL68517.1            | aconitate hydratase AcnA                                                                          | 0.205167 |
| NHL66489.1            | protein-L-isoaspartate(D-aspartate) O-methyltransferase                                           | 0.202945 |
| NHL65269.1            | ATP-binding protein                                                                               | 0.202559 |
| NHL66429.1            | cephalosporin hydroxylase                                                                         | 0.200581 |
| NHL64849.1            | bifunctional tRNA (5-methylaminomethyl-2-thiouridine)(34)-methyltransferase MnmD                  | 0.200222 |
| NHL68090.1            | NADP-dependent glyceraldehyde-3-phosphate dehydrogenase                                           | 0.200138 |
| NHL64847.1            | GTP-binding protein                                                                               | 0.198174 |
| NHL65035.1            | TetR/AcrR family transcriptional regulator                                                        | 0.197882 |
| NHL65180.1            | type VI secretion system baseplate subunit TssF                                                   | 0.197573 |
| NHL67571.1            | 5-methyltetrahydrofolate-homocysteine methyltransferase                                           | 0.196095 |
| NHL65773.1            | lactate utilization protein C                                                                     | 0.19556  |
| NHL70886.1            | amino acid adenylation domain-containing protein                                                  | 0.195118 |
| NHL67262.1            | carbohydrate kinase                                                                               | 0.194803 |
| NHL69147.1            | GMC family oxidoreductase                                                                         | 0.194413 |
| NHL65690.1            | guanine deaminase                                                                                 | 0.193813 |
| NHL67333.1            | ferritin-like domain-containing protein                                                           | 0.193093 |
| NHL66836.1            | urocanate hydratase                                                                               | 0.192765 |
| NHL70337.1            | type III secretion system outer membrane ring subunit SctC                                        | 0.192751 |
| NHL67099.1            | pantoate-beta-alanine ligase                                                                      | 0.192654 |
| NHL64970.1            | chemotaxis protein CheY                                                                           | 0.192599 |
| NHL69950.1            | purine nucleoside permease                                                                        | 0.192383 |
| NHL65260.1            | D-alanine-D-alanine ligase                                                                        | 0.19231  |
| NHL67740.1            | DUF484 family protein                                                                             | 0.192163 |
| NHL66702.1            | tRNA (adenosine(37)-N6)-threonylcarbamoyltransferase complex dimerization subunit type 1 TsaB     | 0.190859 |
| NHL69963.1            | IcIR family transcriptional regulator                                                             | 0.189822 |
| NHL67650.1;NHL66829.1 | glutamine synthetase                                                                              | 0.187377 |
| NHL70997.1            | ATP-binding protein                                                                               | 0.187239 |
| NHL69377.1            | cupin domain-containing protein                                                                   | 0.185533 |
| NHL66443.1            | hypothetical protein EIB72_08595                                                                  | 0.183928 |
| NHL66454.1            | polyhydroxyalkanoate synthesis repressor PhaR                                                     | 0.183889 |

|            |                                                                                        |           |   |
|------------|----------------------------------------------------------------------------------------|-----------|---|
| NHL70887.1 | LLM class flavin-dependent oxidoreductase                                              | 0.183503  |   |
| NHL65347.1 | 4-hydroxy-tetrahydrodipicolinate reductase                                             | 0.183043  |   |
| NHL67562.1 | D-glycero-beta-D-manno-heptose 1-phosphate adenylyltransferase                         | 0.180984  |   |
| NHL67289.1 | branched-chain amino acid transaminase                                                 | 0.177036  |   |
| NHL65141.1 | histidine triad nucleotide-binding protein                                             | 0.176674  |   |
| NHL70883.1 | amino acid adenylation domain-containing protein                                       | 0.17584   |   |
| NHL66491.1 | CoA transferase                                                                        | 0.175538  |   |
| NHL65435.1 | DNA repair protein RecN                                                                | 0.175096  |   |
| NHL65734.1 | electron transfer flavoprotein subunit beta/FixA family protein                        | 0.174174  |   |
| NHL66811.1 | rhodanese-like domain-containing protein                                               | 0.173996  |   |
| NHL65623.1 | UbiD family decarboxylase                                                              | 0.172305  |   |
| NHL65377.1 | iron-sulfur cluster insertion protein ErpA                                             | 0.167552  |   |
| NHL65852.1 | aspartate aminotransferase family protein                                              | 0.166997  |   |
| NHL66783.1 | Fe-S protein assembly chaperone HscA                                                   | 0.166611  |   |
| NHL66149.1 | hypothetical protein EIB72_07090                                                       | 0.166239  |   |
| NHL66666.1 | 3-hydroxyacyl-ACP dehydratase FabZ                                                     | 0.16567   |   |
| NHL64853.1 | glutamine amidotransferase                                                             | 0.165338  |   |
| NHL70205.1 | malate synthase G                                                                      | 0.165126  |   |
| NHL67448.1 | adenine phosphoribosyltransferase                                                      | 0.164473  |   |
| NHL67075.1 | fused uroporphyrinogen-III synthase HemD/membrane protein HemX                         | 0.16361   |   |
| NHL66889.1 | carboxypeptidase family protein                                                        | 0.163116  |   |
| NHL65653.1 | septum site-determining protein MinC                                                   | 0.162478  |   |
| NHL67822.1 | ribonuclease P protein component                                                       | 0.162358  |   |
| NHL67135.1 | ABC transporter substrate-binding protein                                              | 0.158883  |   |
| NHL67686.1 | glutathione S-transferase family protein                                               | 0.158435  |   |
| NHL66310.1 | AAA domain-containing protein                                                          | 0.155239  |   |
| NHL67234.1 | Lrp/AsnC family transcriptional regulator                                              | 0.155078  |   |
| NHL65227.1 | M61 family metalloproteinase                                                           | 0.154167  |   |
| NHL69045.1 | phosphoenolpyruvate carboxykinase (GTP)                                                | 0.153126  |   |
| NHL71015.1 | malto-oligosyltrehalose synthase                                                       | 0.15296   |   |
| NHL66264.1 | ribokinase                                                                             | 0.152482  |   |
| NHL70008.1 | glucose-6-phosphate dehydrogenase                                                      | 0.151818  |   |
| NHL64936.1 | PAAR domain-containing protein                                                         | 0.150957  |   |
| NHL69519.1 | GNAT family N-acetyltransferase                                                        | 0.150675  |   |
| NHL67791.1 | D-2-hydroxyacid dehydrogenase family protein                                           | 0.149448  |   |
| NHL66675.1 | UMP kinase                                                                             | 0.148904  |   |
| NHL67582.1 | bifunctional isocitrate dehydrogenase kinase/phosphatase                               | 0.148486  |   |
| NHL70408.1 | TetR/AcrR family transcriptional regulator                                             | 0.148443  |   |
| NHL65553.1 | YggE/AlgH family protein                                                               | 0.146952  |   |
| NHL68437.1 | HAMP domain-containing histidine kinase                                                | 0.146928  |   |
| NHL65215.1 | HAD-IA family hydrolase                                                                | 0.146156  |   |
| NHL66917.1 | triose-phosphate isomerase                                                             | 0.145363  |   |
| NHL67702.1 | NAD(P)/FAD-dependent oxidoreductase                                                    | 0.142988  |   |
| NHL66765.1 | Hsp33 family molecular chaperone HslO                                                  | 0.14227   |   |
| NHL65119.1 | thiamine phosphate synthase                                                            | 0.142194  |   |
| NHL65784.1 | HAD-IA family hydrolase                                                                | 0.139421  |   |
| NHL65676.1 | chorismate mutase                                                                      | 0.13857   |   |
| NHL65042.1 | SGNH/GDSL hydrolase family protein                                                     | 0.13785   |   |
| NHL65062.1 | 30S ribosomal protein S19                                                              | 0.137681  |   |
| NHL71123.1 | hypothetical protein EIB72_32620                                                       | 0.13716   |   |
| NHL70457.1 | ProQ activator of osmoprotectant transporter prop                                      | 0.134538  |   |
| NHL66782.1 | ISC system 2Fe-2S type ferredoxin                                                      | 0.134375  |   |
| NHL68555.1 | 3-isopropylmalate dehydrogenase                                                        | 0.132494  |   |
| NHL70213.1 | squalene-hopene cyclase                                                                | 0.130404  |   |
| NHL64894.1 | branched-chain amino acid ABC transporter substrate-binding protein                    | 0.129061  |   |
| NHL70681.1 | antibiotic biosynthesis monooxygenase                                                  | 0.127913  |   |
| NHL67065.1 | NAD+ synthase                                                                          | 0.127774  |   |
| NHL65856.1 | N-succinylarginine dihydrolase                                                         | 0.126689  |   |
| NHL71098.1 | sel1 repeat family protein                                                             | 0.123917  |   |
| NHL70426.1 | bifunctional (p)ppGpp synthetase/guanosine-3,5-bis(diphosphate) 3-pyrophosphohydrolase | 0.123535  |   |
| NHL64884.1 | FOF1 ATP synthase subunit delta                                                        | 0.1221    | + |
| NHL67005.1 | spermidine synthase                                                                    | 0.121634  |   |
| NHL67808.1 | glutamyl-cysteine ligase                                                               | 0.121384  |   |
| NHL66925.1 | 2-isopropylmalate synthase                                                             | 0.119937  |   |
| NHL65665.1 | RdgB/HAM1 family non-canonical purine NTP pyrophosphatase                              | 0.118066  |   |
| NHL66206.1 | ribonuclease R                                                                         | 0.117802  |   |
| NHL70136.1 | 4-hydroxy-3-methylbut-2-enyl diphosphate reductase                                     | 0.116819  |   |
| NHL65644.1 | thioredoxin-disulfide reductase                                                        | 0.116599  |   |
| NHL70073.1 | low-specificity L-threonine aldolase                                                   | 0.114548  |   |
| NHL66956.1 | methylglyoxal synthase                                                                 | 0.11412   |   |
| NHL65364.1 | Glu/Leu/Phe/Val dehydrogenase                                                          | 0.113158  |   |
| NHL68454.1 | AMP nucleosidase                                                                       | 0.112113  |   |
| NHL65523.1 | alanine-glyoxylate aminotransferase family protein                                     | 0.111725  |   |
| NHL65278.1 | octaprenyl diphosphate synthase                                                        | 0.110161  |   |
| NHL65958.1 | YhbY family RNA-binding protein                                                        | 0.10857   |   |
| NHL67737.1 | methionine adenosyltransferase                                                         | 0.10773   |   |
| NHL70026.1 | succinylglutamate desuccinylase/aspartoacylase family protein                          | 0.107541  |   |
| NHL67565.1 | alginate biosynthesis protein AlgP                                                     | 0.106565  |   |
| NHL64878.1 | ParB/RepB/Spo0J family partition protein                                               | 0.106462  |   |
| NHL68977.1 | UDP-N-acetylglucosamine 1-carboxyvinyltransferase                                      | 0.106284  |   |
| NHL65289.1 | signal recognition particle protein                                                    | 0.103008  |   |
| NHL67811.1 | VOC family protein                                                                     | 0.10272   |   |
| NHL66627.1 | LysR family transcriptional regulator                                                  | 0.102582  |   |
| NHL65490.1 | tol-pal system protein YbgF                                                            | 0.102102  |   |
| NHL65674.1 | cold-shock protein                                                                     | 0.101539  |   |
| NHL66450.1 | 30S ribosomal protein S12 methylthiotransferase RimO                                   | 0.10061   |   |
| NHL70875.1 | PhzF family phenazine biosynthesis protein                                             | 0.10018   |   |
| NHL67038.1 | SDR family NAD(P)-dependent oxidoreductase                                             | 0.0999775 |   |
| NHL66589.1 | glucose-6-phosphate isomerase                                                          | 0.0990925 |   |
| NHL66143.1 | integration host factor subunit alpha                                                  | 0.0980123 |   |
| NHL68151.1 | hypothetical protein EIB72_17370                                                       | 0.0972468 |   |
| NHL66885.1 | DUF2863 family protein                                                                 | 0.0965436 |   |
| NHL68723.1 | phosphoenolpyruvate mutase                                                             | 0.0953318 |   |
| NHL66987.1 | DNA translocase FtsK                                                                   | 0.0952911 |   |
| NHL66966.1 | ribonuclease G                                                                         | 0.0949542 |   |
| NHL65447.1 | deoxynucleoside kinase                                                                 | 0.0934315 |   |
| NHL71144.1 | alpha/beta hydrolase                                                                   | 0.0929896 |   |
| NHL68922.1 | VOC family protein                                                                     | 0.0929712 |   |



|            |                                                                                        |            |
|------------|----------------------------------------------------------------------------------------|------------|
| NHL65463.1 | polyisalic acid transporter                                                            | 0.090203   |
| NHL65753.1 | metalloprotease PmbA                                                                   | 0.0899118  |
| NHL64883.1 | FOF1 ATP synthase subunit B                                                            | 0.0898018  |
| NHL66254.1 | transcriptional repressor LexA                                                         | 0.0896263  |
| NHL67054.1 | response regulator                                                                     | 0.0895627  |
| NHL69404.1 | porin                                                                                  | 0.0888462  |
| NHL65156.1 | hypothetical protein EIB72_01950                                                       | 0.0878677  |
| NHL66923.1 | carbonic anhydrase                                                                     | 0.0867589  |
| NHL67454.1 | LPS export ABC transporter ATP-binding protein                                         | 0.0867316  |
| NHL67226.1 | tRNA cyclic N6-threonylcarbamoyladenosine(37) synthase TcdA                            | 0.0863679  |
| NHL67130.1 | sulfate adenylyltransferase subunit CysD                                               | 0.086319   |
| NHL65771.1 | ferredoxin family protein                                                              | 0.0841993  |
| NHL67496.1 | hypothetical protein EIB72_14035                                                       | 0.0837936  |
| NHL66137.1 | threonine-tRNA ligase                                                                  | 0.0833988  |
| NHL66942.1 | DUF924 domain-containing protein                                                       | 0.0828679  |
| NHL67061.1 | GNAT family N-acetyltransferase                                                        | 0.0816256  |
| NHL66991.1 | Tetr/AcrR family transcriptional regulator                                             | 0.0814546  |
| NHL65131.1 | histidinol dehydrogenase                                                               | 0.0807775  |
| NHL65059.1 | 50S ribosomal protein L4                                                               | 0.0791734  |
| NHL67403.1 | D-aminoacylase                                                                         | 0.0784537  |
| NHL66093.1 | sulfurtransferase Tusa family protein                                                  | 0.0784467  |
| NHL67174.1 | ATP-dependent Clp protease ATP-binding subunit ClpA                                    | 0.0772896  |
| NHL68399.1 | DUF883 domain-containing protein                                                       | 0.0767899  |
| NHL67465.1 | 4-(cytidine 5-diphospho)-2-C-methyl-D-erythritol kinase                                | 0.0753384  |
| NHL65254.1 | UDP-N-acetylmuramoyl-tripeptide-D-alanyl-D-alanine ligase                              | 0.0737279  |
| NHL66233.1 | DUF695 domain-containing protein                                                       | 0.0736694  |
| NHL67180.1 | NADP-dependent isocitrate dehydrogenase                                                | 0.0733674  |
| NHL68521.1 | malate dehydrogenase                                                                   | 0.0726109  |
| NHL68519.1 | hypothetical protein EIB72_19240                                                       | 0.0719859  |
| NHL66695.1 | DNA repair protein RadA                                                                | 0.071387   |
| NHL66681.1 | peptide deformylase                                                                    | 0.0692418  |
| NHL65359.1 | gluconokinase                                                                          | 0.0663287  |
| NHL66521.1 | pyridoxal phosphate-dependent aminotransferase                                         | 0.0644213  |
| NHL65279.1 | 50S ribosomal protein L21                                                              | 0.063652   |
| NHL66800.1 | response regulator transcription factor                                                | 0.0617657  |
| NHL65636.1 | 6-phosphogluconolactonase                                                              | 0.060051   |
| NHL64955.1 | Cof-type HAD-IB family hydrolase                                                       | 0.05959    |
| NHL67766.1 | Asp-tRNA(Asn)/Glu-tRNA(Gln) amidotransferase subunit GatB                              | 0.0574805  |
| NHL65508.1 | peroxiredoxin                                                                          | 0.0572751  |
| NHL68009.1 | response regulator                                                                     | 0.0572573  |
| NHL66909.1 | NADH-quinone oxidoreductase subunit G                                                  | 0.0571327  |
| NHL66023.1 | hypothetical protein EIB72_06445                                                       | 0.0569331  |
| NHL66752.1 | cupin domain-containing protein                                                        | 0.0565866  |
| NHL67127.1 | cobalamin biosynthesis protein CbiX                                                    | 0.0544872  |
| NHL65509.1 | acyl-CoA dehydrogenase                                                                 | 0.054011   |
| NHL71099.1 | phospholipase                                                                          | 0.0527623  |
| NHL65088.1 | porphobilinogen synthase                                                               | 0.0512269  |
| NHL65084.1 | DNA-directed RNA polymerase subunit alpha                                              | 0.0492433  |
| NHL67956.1 | ATP-dependent RNA helicase DbpA                                                        | 0.0474701  |
| NHL67476.1 | 2-isopropylmalate synthase                                                             | 0.0472056  |
| NHL65130.1 | ATP phosphoribosyltransferase                                                          | 0.0471821  |
| NHL67120.1 | dihydroxy-acid dehydratase                                                             | 0.046025   |
| NHL66136.1 | bifunctional (p)ppGpp synthetase/guanosine-3,5-bis(diphosphate) 3-pyrophosphohydrolase | 0.0452957  |
| NHL66828.1 | aspartate aminotransferase family protein                                              | 0.0450026  |
| NHL68561.1 | tryptophan synthase subunit beta                                                       | 0.0447521  |
| NHL69523.1 | DUF4142 domain-containing protein                                                      | 0.0440038  |
| NHL65191.1 | phage tail protein                                                                     | 0.0431169  |
| NHL67935.1 | phosphotransferase                                                                     | 0.0428727  |
| NHL66477.1 | tetratricopeptide repeat protein                                                       | 0.0416997  |
| NHL67436.1 | acetoacetyl-CoA reductase                                                              | 0.0405229  |
| NHL66758.1 | tryptophan-tRNA ligase                                                                 | 0.0402991  |
| NHL66565.1 | Paal family thioesterase                                                               | 0.0400155  |
| NHL65752.1 | ribosome-associated protein                                                            | 0.039004   |
| NHL67152.1 | ABC transporter ATP-binding protein                                                    | 0.0376301  |
| NHL70054.1 | SDR family oxidoreductase                                                              | 0.0351779  |
| NHL65112.1 | glutamate synthase subunit beta                                                        | 0.0326678  |
| NHL65727.1 | cysteine synthase CysM                                                                 | 0.0321916  |
| NHL70412.1 | aromatic ring-hydroxylating dioxygenase subunit alpha                                  | 0.0321369  |
| NHL71078.1 | response regulator                                                                     | 0.0298856  |
| NHL67214.1 | YajQ family cyclic di-GMP-binding protein                                              | 0.0294253  |
| NHL68835.1 | homoprotocatechuate degradation operon regulator HpaR                                  | 0.0290521  |
| NHL66913.1 | NADH-quinone oxidoreductase subunit C                                                  | 0.0290508  |
| NHL66592.1 | peptidylprolyl isomerase                                                               | 0.0283025  |
| NHL67637.1 | UDP-N-acetylglucosamine diphosphorylase/glucosamine-1-phosphate N-acetyltransferase    | 0.0281321  |
| NHL65259.1 | UDP-N-acetylmuramate-L-alanine ligase                                                  | 0.0270596  |
| NHL65534.1 | BON domain-containing protein                                                          | 0.0248775  |
| NHL67524.1 | glutathione synthase                                                                   | 0.0234038  |
| NHL67040.1 | serine protease inhibitor ecotin                                                       | 0.0232499  |
| NHL68522.1 | GntR family transcriptional regulator                                                  | 0.0222289  |
| NHL68452.1 | homoserine kinase                                                                      | 0.0214895  |
| NHL67310.1 | response regulator transcription factor                                                | 0.0200704  |
| NHL69753.1 | ABC transporter ATP-binding protein                                                    | 0.0199598  |
| NHL70041.1 | hypothetical protein EIB72_27065                                                       | 0.0185127  |
| NHL68523.1 | succinate dehydrogenase, cytochrome b556 subunit                                       | 0.0181777  |
| NHL65492.1 | Tol-Pal system protein TolB                                                            | 0.0178668  |
| NHL71134.1 | tetratricopeptide repeat protein                                                       | 0.0162875  |
| NHL66048.1 | pirin family protein                                                                   | 0.0156562  |
| NHL66158.1 | ribosome maturation factor RimP                                                        | 0.015426   |
| NHL70145.1 | carbon starvation protein A                                                            | 0.0150312  |
| NHL67400.1 | threonine ammonia-lyase, biosynthetic                                                  | 0.0131512  |
| NHL66988.1 | lactonase family protein                                                               | 0.0118306  |
| NHL67206.1 | adenylate kinase                                                                       | 0.0111675  |
| NHL66125.1 | SDR family oxidoreductase                                                              | 0.0110836  |
| NHL65775.1 | D-glycerate dehydrogenase                                                              | 0.00926526 |
| NHL66016.1 | NADPH:quinone oxidoreductase family protein                                            | 0.00875473 |
| NHL67834.1 | arsenate reductase (glutaredoxin)                                                      | 0.00847371 |
| NHL66665.1 | acyl-ACP-UDP-N-acetylglucosamine O-acyltransferase                                     | 0.00709597 |
| NHL66785.1 | iron-sulfur cluster assembly protein IscA                                              | 0.0066452  |

|                       |                                                                                             |             |  |
|-----------------------|---------------------------------------------------------------------------------------------|-------------|--|
| NHL66525.1            | DegT/DnrJ/EryC1/Str5 aminotransferase family protein                                        | 0.00524584  |  |
| NHL65155.1            | RHS repeat protein                                                                          | 0.00345039  |  |
| NHL66735.1            | tRNA lysidine(34) synthetase TlIS                                                           | 0.00330162  |  |
| NHL66554.1            | hypothetical protein EIB72_09160                                                            | 0.00318782  |  |
| NHL67011.1            | VOC family protein                                                                          | 0.00125821  |  |
| NHL69966.1            | alkene reductase                                                                            | 0.000808716 |  |
| NHL64808.1            | ergothioneine biosynthesis protein EgtB                                                     | 0           |  |
| NHL64845.1            | type II secretion system secretin GspD                                                      | 0           |  |
| NHL64900.1            | ABC transporter substrate-binding protein                                                   | 0           |  |
| NHL64951.1            | flagellin                                                                                   | 0           |  |
| NHL64965.1            | chemotaxis protein CheW                                                                     | 0           |  |
| NHL64980.1            | RNA polymerase sigma factor FlIA                                                            | 0           |  |
| NHL64993.1            | exonuclease                                                                                 | 0           |  |
| NHL65036.1            | DUF1835 domain-containing protein                                                           | 0           |  |
| NHL65109.1            | OmpW family protein                                                                         | 0           |  |
| NHL65125.1            | STAS domain-containing protein                                                              | 0           |  |
| NHL65214.1            | cysteine hydrolase                                                                          | 0           |  |
| NHL65238.1            | murein transglycosylase                                                                     | 0           |  |
| NHL65239.1            | phenylacetate--CoA ligase                                                                   | 0           |  |
| NHL65308.1            | UDP-N-acetylmuramate--alanine ligase                                                        | 0           |  |
| NHL65329.1            | thiamine-phosphate kinase                                                                   | 0           |  |
| NHL65363.1            | LysR family transcriptional regulator                                                       | 0           |  |
| NHL65468.1            | hypothetical protein EIB72_03540                                                            | 0           |  |
| NHL65488.1            | glycosyltransferase family 1 protein                                                        | 0           |  |
| NHL65496.1            | tol-pal system-associated acyl-CoA thioesterase                                             | 0           |  |
| NHL65648.1            | DUF2164 domain-containing protein                                                           | 0           |  |
| NHL65701.1            | FAD-binding monooxygenase                                                                   | 0           |  |
| NHL65702.1            | formate dehydrogenase subunit delta                                                         | 0           |  |
| NHL65777.1            | GNAT family N-acetyltransferase                                                             | 0           |  |
| NHL65791.1            | phosphate acyltransferase PlsX                                                              | 0           |  |
| NHL65822.1            | type I methionyl aminopeptidase                                                             | 0           |  |
| NHL65870.1            | alpha/beta hydrolase                                                                        | 0           |  |
| NHL65875.1            | Rrf2 family transcriptional regulator                                                       | 0           |  |
| NHL65905.1            | substrate-binding domain-containing protein                                                 | 0           |  |
| NHL65982.1            | AMP-binding protein                                                                         | 0           |  |
| NHL65983.1            | peptidoglycan DD-metalloendopeptidase family protein                                        | 0           |  |
| NHL66009.1            | ABC transporter substrate-binding protein                                                   | 0           |  |
| NHL66044.1            | cellulose synthase operon protein YhjQ                                                      | 0           |  |
| NHL66067.1            | CoA transferase                                                                             | 0           |  |
| NHL66118.1            | MFS transporter                                                                             | 0           |  |
| NHL66151.1            | hypothetical protein EIB72_07100                                                            | 0           |  |
| NHL66162.1            | tRNA pseudouridine(55) synthase TruB                                                        | 0           |  |
| NHL66166.1            | MarR family transcriptional regulator                                                       | 0           |  |
| NHL66241.1            | Paal family thioesterase                                                                    | 0           |  |
| NHL66271.1            | ABC transporter substrate-binding protein                                                   | 0           |  |
| NHL66276.1            | MexX/AxyX family multidrug efflux RND transporter periplasmic adaptor subunit               | 0           |  |
| NHL66302.1            | hypothetical protein EIB72_07880                                                            | 0           |  |
| NHL66307.1            | uroporphyrinogen-III C-methyltransferase                                                    | 0           |  |
| NHL66341.1            | extracellular solute-binding protein                                                        | 0           |  |
| NHL66346.1            | ABC transporter substrate-binding protein                                                   | 0           |  |
| NHL66347.1            | response regulator                                                                          | 0           |  |
| NHL66348.1            | EAL domain-containing protein                                                               | 0           |  |
| NHL66361.1            | MarR family transcriptional regulator                                                       | 0           |  |
| NHL66362.1            | GNAT family N-acetyltransferase                                                             | 0           |  |
| NHL66448.1            | hypothetical protein EIB72_08620                                                            | 0           |  |
| NHL66492.1            | recombination protein RecR                                                                  | 0           |  |
| NHL66514.1            | Rrf2 family transcriptional regulator                                                       | 0           |  |
| NHL66538.1            | primosomal replication protein N                                                            | 0           |  |
| NHL66547.1            | asparaginase                                                                                | 0           |  |
| NHL66548.1            | phosphate starvation-inducible protein PsIF                                                 | 0           |  |
| NHL66619.1            | threonine/serine dehydratase                                                                | 0           |  |
| NHL66655.1            | RnfH family protein                                                                         | 0           |  |
| NHL66706.1            | universal stress protein                                                                    | 0           |  |
| NHL66710.1            | gamma-glutamylcyclotransferase                                                              | 0           |  |
| NHL66763.1            | ferritin-like domain-containing protein                                                     | 0           |  |
| NHL66809.1            | PAS domain-containing sensor histidine kinase                                               | 0           |  |
| NHL66867.1            | MotA/ToIQ/ExbB proton channel family protein                                                | 0           |  |
| NHL66870.1            | pirin family protein                                                                        | 0           |  |
| NHL66884.1            | Cu(I)-responsive transcriptional regulator                                                  | 0           |  |
| NHL66886.1            | response regulator transcription factor                                                     | 0           |  |
| NHL66897.1            | MaoC family dehydratase                                                                     | 0           |  |
| NHL66992.1            | electron transport complex subunit RxB                                                      | 0           |  |
| NHL66993.1            | endonuclease III                                                                            | 0           |  |
| NHL67010.1            | PLP-dependent aminotransferase family protein                                               | 0           |  |
| NHL67016.1            | PhzF family phenazine biosynthesis protein                                                  | 0           |  |
| NHL67066.1            | N-acetyltransferase                                                                         | 0           |  |
| NHL67079.1            | helix-turn-helix domain-containing protein                                                  | 0           |  |
| NHL67118.1            | prolipoprotein diacylglycerol transferase                                                   | 0           |  |
| NHL67181.1            | pseudouridine synthase                                                                      | 0           |  |
| NHL67245.1            | sugar-binding transcriptional regulator                                                     | 0           |  |
| NHL67272.1            | DUF427 domain-containing protein                                                            | 0           |  |
| NHL67279.1            | acylhydrolase                                                                               | 0           |  |
| NHL67294.1            | DUF2946 family protein                                                                      | 0           |  |
| NHL67307.1            | DUF2889 domain-containing protein                                                           | 0           |  |
| NHL67429.1            | MMPL family transporter                                                                     | 0           |  |
| NHL67462.1            | bifunctional DNA-formamidopyrimidine glycosylase/DNA-(apurinic or apyrimidinic site) lyase  | 0           |  |
| NHL67507.1            | cytochrome c oxidase subunit I                                                              | 0           |  |
| NHL67512.1            | tRNA (uridine(34)/cytosine(34)/5-carboxymethylaminomethyluridine(34)-2-O)-methyltransferase | 0           |  |
| NHL67527.1            | P-II family nitrogen regulator                                                              | 0           |  |
| NHL67532.1            | sigma-54-dependent Fis family transcriptional regulator                                     | 0           |  |
| NHL67617.1            | YbaK/EbsC family protein                                                                    | 0           |  |
| NHL67630.1;NHL66200.1 | carbohydrate kinase                                                                         | 0           |  |
| NHL67633.1            | class I SAM-dependent methyltransferase                                                     | 0           |  |
| NHL67634.1            | SDR family oxidoreductase                                                                   | 0           |  |
| NHL67689.1            | 5-formyltetrahydrofolate cyclo-ligase                                                       | 0           |  |
| NHL67693.1            | 5-oxoprolinase subunit PxpA                                                                 | 0           |  |
| NHL67704.1            | hypothetical protein EIB72_15075                                                            | 0           |  |
| NHL67761.1            | M48 family metallopeptidase                                                                 | 0           |  |

|                           |                                                                               |             |
|---------------------------|-------------------------------------------------------------------------------|-------------|
| NHL67841.1                | DUF2471 domain-containing protein                                             | 0           |
| NHL67887.1                | SDR family oxidoreductase                                                     | 0           |
| NHL67949.1                | LysR family transcriptional regulator                                         | 0           |
| NHL68004.1                | two-component system response regulator                                       | 0           |
| NHL68023.1                | DUF3422 domain-containing protein                                             | 0           |
| NHL68099.1                | FAD-binding oxidoreductase                                                    | 0           |
| NHL68183.1                | hypothetical protein EIB72_17530                                              | 0           |
| NHL68245.1                | hypothetical protein EIB72_17840                                              | 0           |
| NHL68359.1                | type VI secretion system baseplate subunit TssF                               | 0           |
| NHL68379.1                | methyl-accepting chemotaxis protein                                           | 0           |
| NHL68398.1                | hypothetical protein EIB72_18630                                              | 0           |
| NHL68410.1                | mannose-1-phosphate guanylyltransferase/mannose-6-phosphate isomerase         | 0           |
| NHL68412.1                | UDP-glucose/GDP-mannose dehydrogenase family protein                          | 0           |
| NHL68428.1                | DUF2384 domain-containing protein                                             | 0           |
| NHL68754.1                | glycoside hydrolase family 31 protein                                         | 0           |
| NHL68774.1                | DEAD/DEAH box helicase                                                        | 0           |
| NHL68780.1                | beta-ketoacyl synthase chain length factor                                    | 0           |
| NHL68793.1                | 3-oxoacyl-ACP reductase FabG                                                  | 0           |
| NHL68882.1                | LacI family DNA-binding transcriptional regulator                             | 0           |
| NHL68975.1                | helix-turn-helix domain-containing protein                                    | 0           |
| NHL68996.1                | TetR/AcrR family transcriptional regulator                                    | 0           |
| NHL69061.1                | translation initiation factor IF-1                                            | 0           |
| NHL69144.1                | porin                                                                         | 0           |
| NHL69168.1                | D-alanyl-D-alanine endopeptidase                                              | 0           |
| NHL69351.1                | carbamate kinase                                                              | 0           |
| NHL69359.1                | amidase                                                                       | 0           |
| NHL69389.1                | FUSC family protein                                                           | 0           |
| NHL69426.1                | amidohydrolase family protein                                                 | 0           |
| NHL69457.1                | dihydrodipicolinate reductase                                                 | 0           |
| NHL69463.1                | entericidin A/B family lipoprotein                                            | 0           |
| NHL69488.1                | xanthine dehydrogenase family protein molybdopterin-binding subunit           | 0           |
| NHL69538.1                | lysozyme                                                                      | 0           |
| NHL69574.1                | rhodanese-like domain-containing protein                                      | 0           |
| NHL69670.1                | FAD-binding oxidoreductase                                                    | 0           |
| NHL69718.1                | autoinducer 2 ABC transporter substrate-binding protein                       | 0           |
| NHL69721.1                | glycine betaine ABC transporter substrate-binding protein                     | 0           |
| NHL69769.1                | 2-hydroxyacid dehydrogenase                                                   | 0           |
| NHL69774.1                | lytic transglycosylase domain-containing protein                              | 0           |
| NHL69836.1                | mannitol dehydrogenase family protein                                         | 0           |
| NHL69848.1                | FMN-binding negative transcriptional regulator                                | 0           |
| NHL69902.1                | shikimate dehydrogenase                                                       | 0           |
| NHL69932.1                | DUF3579 domain-containing protein                                             | 0           |
| NHL70005.1                | peroxidase-related enzyme                                                     | 0           |
| NHL70013.1                | 2,5-didehydrogluconate reductase DkgB                                         | 0           |
| NHL70055.1                | TetR/AcrR family transcriptional regulator                                    | 0           |
| NHL70065.1                | 2-hydroxychromene-2-carboxylate isomerase                                     | 0           |
| NHL70112.1                | thioredoxin family protein                                                    | 0           |
| NHL70128.1                | acylphosphatase                                                               | 0           |
| NHL70141.1                | DOPA 4,5-dioxygenase family protein                                           | 0           |
| NHL70208.1                | response regulator transcription factor                                       | 0           |
| NHL70233.1                | LysR family transcriptional regulator                                         | 0           |
| NHL70235.1                | Re/Si-specific NAD(P)(+) transhydrogenase subunit alpha                       | 0           |
| NHL70279.1                | helix-turn-helix transcriptional regulator                                    | 0           |
| NHL70335.1                | response regulator transcription factor                                       | 0           |
| NHL70374.1                | helix-turn-helix transcriptional regulator                                    | 0           |
| NHL70397.1;NHL70401.1     | DUF1348 family protein                                                        | 0           |
| NHL70505.1                | thioesterase                                                                  | 0           |
| NHL70526.1                | hypothetical protein EIB72_29565                                              | 0           |
| NHL70565.1                | hypothetical protein EIB72_29780                                              | 0           |
| NHL70725.1                | hypothetical protein EIB72_30580                                              | 0           |
| NHL70740.1                | D-xylose ABC transporter ATP-binding protein                                  | 0           |
| NHL70768.1                | amidohydrolase                                                                | 0           |
| NHL70841.1                | oxidoreductase                                                                | 0           |
| NHL70926.1                | LysR family transcriptional regulator                                         | 0           |
| NHL70950.1                | TauD/TfdA family dioxygenase                                                  | 0           |
| NHL70994.1                | catechol 1,2-dioxygenase                                                      | 0           |
| NHL71008.1                | DUF2591 family protein                                                        | 0           |
| NHL71021.1                | phosphatidylserine decarboxylase family protein                               | 0           |
| NHL71024.1                | type 1 glutamine amidotransferase                                             | 0           |
| NHL71108.1                | molybdopterin molybdotransferase MoeA                                         | 0           |
| NHL71172.1                | TetR family transcriptional regulator                                         | 0           |
| NHL71174.1                | molybdopterin-dependent oxidoreductase                                        | 0           |
| NHL68566.1;REV_NHL68566.1 | sporulation protein                                                           | -1.84E-05   |
| NHL67670.1                | flagellar brake protein                                                       | -0.00150108 |
| NHL67597.1                | glutathione S-transferase                                                     | -0.00321325 |
| NHL69884.1                | 5-methyltetrahydropteroyltrimethylglutamate--homocysteine S-methyltransferase | -0.00619062 |
| NHL67765.1                | polyphosphate kinase 2 family protein                                         | -0.00623067 |
| NHL66910.1                | NADH-quinone oxidoreductase subunit NuoF                                      | -0.0068442  |
| NHL69556.1                | N-acetylmuramoyl-L-alanine amidase                                            | -0.00727336 |
| NHL70888.1                | AMP-binding protein                                                           | -0.00891622 |
| NHL69790.1                | SDR family oxidoreductase                                                     | -0.00925255 |
| NHL65173.1                | type VI secretion system baseplate subunit TssK                               | -0.0100047  |
| NHL66996.1                | cytochrome c                                                                  | -0.0104968  |
| NHL66797.1                | dihydrolipoyllysine-residue acetyltransferase                                 | -0.0105515  |
| NHL65303.1                | 50S ribosomal protein L11 methyltransferase                                   | -0.0108185  |
| NHL65805.1                | ribonuclease III                                                              | -0.0110137  |
| NHL66919.1                | polyribonucleotide nucleotidyltransferase                                     | -0.0115636  |
| NHL67299.1                | glycosyl hydrolase                                                            | -0.0135746  |
| NHL65268.1                | bifunctional glutamate N-acetyltransferase/amino-acid acetyltransferase ArgJ  | -0.0138022  |
| NHL69049.1                | threo-3-hydroxy-L-aspartate ammonia-lyase                                     | -0.0139701  |
| NHL67886.1                | serine acetyltransferase                                                      | -0.0145976  |
| NHL65000.1                | c-type cytochrome                                                             | -0.0160516  |
| NHL65521.1                | LysR family transcriptional regulator                                         | -0.0162309  |
| NHL67858.1                | siderophore-interacting protein                                               | -0.0180047  |
| NHL67156.1                | 4-hydroxy-3-methylbut-2-enyl diphosphate reductase                            | -0.018638   |
| NHL70758.1                | ABC transporter substrate-binding protein                                     | -0.0188039  |
| NHL65079.1                | translation initiation factor IF-1                                            | -0.0189355  |
| NHL65436.1                | NAD kinase                                                                    | -0.0198275  |

|                       |                                                                                        |            |
|-----------------------|----------------------------------------------------------------------------------------|------------|
| NHL69664.1            | type VI secretion system tip protein VgrG                                              | -0.0198797 |
| NHL65831.1            | alpha,alpha-trehalose-phosphate synthase (UDP-forming)                                 | -0.0203603 |
| NHL65118.1            | thiazole synthase                                                                      | -0.0223554 |
| NHL65325.1            | orotidine-5-phosphate decarboxylase                                                    | -0.0230948 |
| NHL65025.1            | N-acetyl-gamma-glutamyl-phosphate reductase                                            | -0.0235551 |
| NHL70668.1            | lipase                                                                                 | -0.0245266 |
| NHL66535.1            | replicative DNA helicase                                                               | -0.0250435 |
| NHL66616.1            | 2-C-methyl-D-erythritol 4-phosphate cytidyltransferase                                 | -0.0264702 |
| NHL65868.1            | IcIR family transcriptional regulator                                                  | -0.0265942 |
| NHL66690.1            | 50S ribosomal protein L3 (N5)-glutamine methyltransferase                              | -0.027689  |
| NHL65183.1            | type VI secretion system protein TssA                                                  | -0.0280043 |
| NHL66810.1            | type I glutamate-ammonia ligase                                                        | -0.0298773 |
| NHL64875.1            | tRNA uridine-5-carboxymethylaminomethyl(34) synthesis enzyme MnmG                      | -0.0306358 |
| NHL67789.1            | DNA topoisomerase III                                                                  | -0.0309989 |
| NHL66558.1            | dTMP kinase                                                                            | -0.0313104 |
| NHL69991.1            | Tetr/AcrR family transcriptional regulator                                             | -0.0316188 |
| NHL66756.1            | 4-hydroxy-tetrahydrodipicolinate synthase                                              | -0.0317205 |
| NHL66480.1            | DUF4115 domain-containing protein                                                      | -0.0320352 |
| NHL65188.1            | type VI secretion system-associated protein TagF                                       | -0.0333443 |
| NHL67370.1            | 4-hydroxythreonine-4-phosphate dehydrogenase PdxA                                      | -0.0339457 |
| NHL64829.1            | LysR family transcriptional regulator                                                  | -0.0340405 |
| NHL65421.1            | YggS family pyridoxal phosphate-dependent enzyme                                       | -0.0365473 |
| NHL67286.1            | phosphoglycerate kinase                                                                | -0.0375341 |
| NHL67548.1            | D-amino acid aminotransferase                                                          | -0.0383968 |
| NHL66816.1            | ATP-dependent RNA helicase HrpA                                                        | -0.0391998 |
| NHL65764.1            | RNA-binding S4 domain-containing protein                                               | -0.0397441 |
| NHL67055.1            | periplasmic heavy metal sensor                                                         | -0.0400244 |
| NHL66447.1            | cystathionine beta-lyase                                                               | -0.0417811 |
| NHL66267.1            | Yeah/YhbH family protein                                                               | -0.0419706 |
| NHL66436.1            | hypothetical protein EIB72_08560                                                       | -0.0424276 |
| NHL65246.1            | long-chain fatty acid-CoA ligase                                                       | -0.0428619 |
| NHL65757.1            | thymidylate synthase                                                                   | -0.043642  |
| NHL70058.1            | SRPBCC family protein                                                                  | -0.0440362 |
| NHL66676.1            | elongation factor Ts                                                                   | -0.0448036 |
| NHL65948.1            | ribonuclease HI                                                                        | -0.0448074 |
| NHL65724.1            | D-glycero-beta-D-manno-heptose-7-phosphate kinase                                      | -0.0454795 |
| NHL67519.1            | S41 family peptidase                                                                   | -0.0459747 |
| NHL66760.1            | threonylcarbamoyl-AMP synthase                                                         | -0.0464001 |
| NHL69316.1            | SDR family oxidoreductase                                                              | -0.0467682 |
| NHL65560.1            | dTDP-glucose 4,6-dehydratase                                                           | -0.0469125 |
| NHL65373.1            | OsmC family protein                                                                    | -0.047212  |
| NHL66818.1            | oxidative damage protection protein                                                    | -0.047397  |
| NHL65813.1            | elongation factor P maturation arginine rhamnosyltransferase EarP                      | -0.0475038 |
| NHL70970.1            | GNAT family N-acetyltransferase                                                        | -0.0476322 |
| NHL65389.1            | UbiH/UbiF/VisC/COQ6 family ubiquinone biosynthesis hydroxylase                         | -0.0492859 |
| NHL68957.1            | universal stress protein                                                               | -0.0521768 |
| NHL71119.1;NHL67781.1 | DUF4132 domain-containing protein                                                      | -0.052927  |
| NHL65491.1            | peptidoglycan-associated lipoprotein Pal                                               | -0.053257  |
| NHL69130.1            | pyrimidine/purine nucleoside phosphorylase                                             | -0.0534611 |
| NHL65135.1            | imidazole glycerol phosphate synthase subunit HisH                                     | -0.0551135 |
| NHL67090.1            | iron-sulfur cluster carrier protein AppC                                               | -0.0554167 |
| NHL67836.1            | AAA family ATPase                                                                      | -0.0576178 |
| NHL67329.1            | c-type cytochrome                                                                      | -0.0579274 |
| NHL67076.1            | hydroxymethylbilane synthase                                                           | -0.0604769 |
| NHL69915.1            | hypothetical protein EIB72_26430                                                       | -0.0609926 |
| NHL65635.1            | bifunctional transcriptional regulator/glucokinase                                     | -0.063268  |
| NHL66539.1            | 30S ribosomal protein S6                                                               | -0.0638371 |
| NHL66972.1            | RcnB family protein                                                                    | -0.0640729 |
| NHL67163.1            | quinolinate synthase NadA                                                              | -0.0651099 |
| NHL69823.1            | isovaleryl-CoA dehydrogenase                                                           | -0.0664934 |
| NHL65466.1            | glycosyltransferase                                                                    | -0.0668659 |
| NHL66126.1            | acyl-CoA thioesterase                                                                  | -0.067009  |
| NHL71120.1            | ATP-dependent Clp protease ATP-binding subunit                                         | -0.0671374 |
| NHL67441.1            | single-stranded DNA-binding protein                                                    | -0.0673618 |
| NHL67150.1            | YukJ family protein                                                                    | -0.0676702 |
| NHL65728.1            | lytic murein transglycosylase B                                                        | -0.0689437 |
| NHL70537.1            | H-NS histone family protein                                                            | -0.0692997 |
| NHL65406.1            | Ycel family protein                                                                    | -0.0729733 |
| NHL68554.1            | 3-isopropylmalate dehydrogenase small subunit                                          | -0.0754662 |
| NHL67508.1            | cytochrome c oxidase subunit II                                                        | -0.0763454 |
| NHL67825.1            | DNA polymerase III subunit beta                                                        | -0.0766017 |
| NHL70151.1            | SDR family oxidoreductase                                                              | -0.0774905 |
| NHL65053.1            | 30S ribosomal protein S12                                                              | -0.0775286 |
| NHL67014.1            | PLP-dependent aminotransferase family protein                                          | -0.0777016 |
| NHL66095.1            | response regulator transcription factor                                                | -0.0782077 |
| NHL65449.1            | polynucleotide adenyltransferase PcnB                                                  | -0.0799115 |
| NHL65598.1            | sulfurtransferase                                                                      | -0.0802816 |
| NHL65670.1            | bifunctional (p)ppGpp synthetase/guanosine-3,5-bis(diphosphate) 3-pyrophosphohydrolase | -0.0803413 |
| NHL68979.1            | 4-hydroxyphenylpyruvate dioxygenase                                                    | -0.0805162 |
| NHL65793.1            | ACP S-malonyltransferase                                                               | -0.0806891 |
| NHL65792.1            | ketoacyl-ACP synthase III                                                              | -0.0821114 |
| NHL65056.1;NHL65043.1 | elongation factor Tu                                                                   | -0.082798  |
| NHL66594.1            | ATP-dependent Clp protease ATP-binding subunit ClpX                                    | -0.0832609 |
| NHL66528.1            | bifunctional UDP-4-keto-pentose/UDP-xylose synthase                                    | -0.0836646 |
| NHL69866.1            | aldehyde dehydrogenase family protein                                                  | -0.0853151 |
| NHL70377.1            | alpha/beta hydrolase                                                                   | -0.0859636 |
| NHL65712.1            | DNA gyrase subunit A                                                                   | -0.0867106 |
| NHL65748.1            | ribosome small subunit-dependent GTPase A                                              | -0.088953  |
| NHL65189.1            | type VI secretion system membrane subunit TssM                                         | -0.0893822 |
| NHL68760.1            | glutathione ABC transporter substrate-binding protein GsiB                             | -0.0907307 |
| NHL71012.1            | glycogen debranching protein GlgX                                                      | -0.0914815 |
| NHL70184.1            | arabinose ABC transporter substrate-binding protein                                    | -0.0922629 |
| NHL67578.1            | ABC transporter substrate-binding protein                                              | -0.0927162 |
| NHL65415.1            | hydrogen peroxide-inducible genes activator                                            | -0.0936546 |
| NHL69146.1            | c-type cytochrome                                                                      | -0.0939649 |
| NHL69808.1            | NIPSNAP family protein                                                                 | -0.0942453 |
| NHL70884.1            | amino acid adenylation domain-containing protein                                       | -0.0952619 |
| NHL67819.1            | helix-turn-helix transcriptional regulator                                             | -0.095705  |

|                       |                                                                                                     |            |
|-----------------------|-----------------------------------------------------------------------------------------------------|------------|
| NHL66064.1            | glutamine-tRNA ligase/YqeY domain fusion protein                                                    | -0.0958576 |
| NHL66975.1            | glycosyltransferase                                                                                 | -0.0962613 |
| NHL66460.1            | RluA family pseudouridine synthase                                                                  | -0.0970014 |
| NHL66957.1            | SDR family oxidoreductase                                                                           | -0.0978305 |
| NHL65794.1            | 3-oxoacyl-ACP reductase FabG                                                                        | -0.0983868 |
| NHL66660.1            | phosphoenolpyruvate synthase                                                                        | -0.0990766 |
| NHL66737.1            | DNA-3-methyladenine glycosylase 2 family protein                                                    | -0.101375  |
| NHL65216.1            | energy-dependent translational throttle protein EttA                                                | -0.10151   |
| NHL65714.1            | 3-phosphoserine/phosphohydroxythreonine transaminase                                                | -0.102146  |
| NHL70407.1            | organic hydroperoxide resistance protein                                                            | -0.104961  |
| NHL70166.1            | GNAT family N-acetyltransferase                                                                     | -0.105748  |
| NHL66248.1            | hypothetical protein EIB72_07610                                                                    | -0.105792  |
| NHL70510.1            | nitroreductase                                                                                      | -0.105853  |
| NHL65075.1            | 30S ribosomal protein S5                                                                            | -0.107838  |
| NHL67599.1            | sulfate ABC transporter substrate-binding protein                                                   | -0.108541  |
| NHL65783.1            | RluA family pseudouridine synthase                                                                  | -0.108664  |
| NHL67309.1            | recombinase RecA                                                                                    | -0.109104  |
| NHL66473.1            | GTPase HflX                                                                                         | -0.110157  |
| NHL66745.1            | inositol monophosphatase                                                                            | -0.110869  |
| NHL67459.1            | RNase adapter RapZ                                                                                  | -0.111031  |
| NHL67510.1            | methyltransferase domain-containing protein                                                         | -0.111197  |
| NHL65336.1            | transketolase                                                                                       | -0.111476  |
| NHL67727.1            | hypothetical protein EIB72_15190                                                                    | -0.112108  |
| NHL67087.1            | arginine/lysine/ornithine decarboxylase                                                             | -0.112627  |
| NHL65718.1            | (d)CMP kinase                                                                                       | -0.114824  |
| NHL65654.1            | septum site-determining protein MinD                                                                | -0.116282  |
| NHL67035.1            | CDP-glucose 4,6-dehydratase                                                                         | -0.116456  |
| NHL67725.1            | coniferyl aldehyde dehydrogenase                                                                    | -0.116613  |
| NHL65407.1            | polyisoprenoid-binding protein                                                                      | -0.117409  |
| NHL65055.1            | elongation factor G                                                                                 | -0.118083  |
| NHL65182.1            | type VI secretion system ATPase TssH                                                                | -0.11942   |
| NHL66959.1            | YebC/PmpR family DNA-binding transcriptional regulator                                              | -0.119958  |
| NHL65884.1            | exodeoxyribonuclease V subunit gamma                                                                | -0.120183  |
| NHL65800.1            | sugar dehydratase                                                                                   | -0.120702  |
| NHL65855.1            | succinylglutamate-semialdehyde dehydrogenase                                                        | -0.125216  |
| NHL67747.1            | response regulator transcription factor                                                             | -0.12662   |
| NHL68883.1            | type 1 glutamine amidotransferase domain-containing protein                                         | -0.127749  |
| NHL65935.1            | biotin-independent malonate decarboxylase subunit beta                                              | -0.128668  |
| NHL67285.1            | pyruvate kinase                                                                                     | -0.130292  |
| NHL67750.1            | acetylglutamate kinase                                                                              | -0.130919  |
| NHL66746.1            | NAD(P)/FAD-dependent oxidoreductase                                                                 | -0.132365  |
| NHL65288.1            | hypoxanthine-guanine phosphoribosyltransferase                                                      | -0.132964  |
| NHL67859.1            | PadR family transcriptional regulator                                                               | -0.133015  |
| NHL68581.1            | DNA-binding protein                                                                                 | -0.133935  |
| NHL67162.1            | carboxylating nicotinate-nucleotide diphosphorylase                                                 | -0.134825  |
| NHL66534.1            | DUF47 domain-containing protein                                                                     | -0.134965  |
| NHL67443.1            | excinuclease ABC subunit UvrA                                                                       | -0.135497  |
| NHL68463.1            | polyprenyl synthetase family protein                                                                | -0.135658  |
| NHL68560.1            | phosphoribosylanthranilate isomerase                                                                | -0.136265  |
| NHL66920.1            | 30S ribosomal protein S15                                                                           | -0.136612  |
| NHL68231.1            | phosphoesterase                                                                                     | -0.137745  |
| NHL69262.1            | SagB/TtcOx family dehydrogenase                                                                     | -0.138092  |
| NHL65300.1            | carbohydrate kinase family protein                                                                  | -0.138346  |
| NHL65570.1            | NAD-dependent epimerase/dehydratase family protein                                                  | -0.140228  |
| NHL66664.1            | lipid-A-disaccharide synthase                                                                       | -0.140938  |
| NHL67354.1            | tRNA (N6-isopentenyl adenosine(37)-C2)-methyltransferase MiaB                                       | -0.141951  |
| NHL66213.1            | cystine ABC transporter substrate-binding protein                                                   | -0.142529  |
| NHL69770.1            | ABC transporter substrate-binding protein                                                           | -0.145258  |
| NHL65393.1            | tRNA 2-thiouridine(34) synthase MnmA                                                                | -0.147771  |
| NHL70791.1            | GntR family transcriptional regulator                                                               | -0.148244  |
| NHL65469.1            | heparinase                                                                                          | -0.149179  |
| NHL65337.1            | type I glyceraldehyde-3-phosphate dehydrogenase                                                     | -0.152455  |
| NHL66139.1            | 50S ribosomal protein L35                                                                           | -0.152598  |
| NHL68588.1            | formate dehydrogenase accessory protein FdhE                                                        | -0.153411  |
| NHL67758.1            | homoserine O-acetyltransferase                                                                      | -0.153828  |
| NHL64851.1            | glutamate-cysteine ligase                                                                           | -0.154218  |
| NHL67050.1;NHL69416.1 | ATP-binding cassette domain-containing protein                                                      | -0.154239  |
| NHL66449.1            | sugar kinase                                                                                        | -0.154364  |
| NHL67393.1            | sterol-binding protein                                                                              | -0.15458   |
| NHL69481.1            | 2-dehydropanoate 2-reductase                                                                        | -0.155965  |
| NHL70751.1            | NAD-dependent succinate-semialdehyde dehydrogenase                                                  | -0.156131  |
| NHL65372.1            | dihydroorotase                                                                                      | -0.157052  |
| NHL67777.1            | 7-carboxy-7-deazaguanine synthase                                                                   | -0.157084  |
| NHL66482.1            | nucleoside-diphosphate kinase                                                                       | -0.158145  |
| NHL67837.1            | ParB/RepB/Spo0I family partition protein                                                            | -0.159207  |
| NHL65717.1            | 3-phosphoshikimate 1-carboxyvinyltransferase                                                        | -0.161276  |
| NHL65626.1            | transcription antitermination factor NusB                                                           | -0.161799  |
| NHL65742.1            | ribosome maturation factor RimM                                                                     | -0.162296  |
| NHL65077.1            | 50S ribosomal protein L15                                                                           | -0.163485  |
| NHL66496.1            | transcription termination factor Rho                                                                | -0.163786  |
| NHL68692.1            | branched-chain amino acid ABC transporter substrate-binding protein                                 | -0.16385   |
| NHL65437.1            | heat-inducible transcriptional repressor HrcA                                                       | -0.164454  |
| NHL67369.1            | 16S rRNA (adenine(1518)-N(6)/adenine(1519)-N(6))-dimethyltransferase RsmA                           | -0.165136  |
| NHL69825.1            | winged helix-turn-helix transcriptional regulator                                                   | -0.167439  |
| NHL66682.1            | NAD-dependent DNA ligase LigA                                                                       | -0.168954  |
| NHL66684.1            | chromosome segregation protein SMC                                                                  | -0.169187  |
| NHL67767.1            | Asp-tRNA(Asn)/Glu-tRNA(Gln) amidotransferase subunit GatA                                           | -0.169273  |
| NHL66621.1            | PspA/IM30 family protein                                                                            | -0.169282  |
| NHL64885.1            | FOF1 ATP synthase subunit alpha                                                                     | -0.170041  |
| NHL66519.1            | threonine synthase                                                                                  | -0.170361  |
| NHL67395.1            | bifunctional demethylmenaquinone methyltransferase/2-methoxy-6-polyprenyl-1,4-benzoquinol methylase | -0.170732  |
| NHL67437.1            | acetyl-CoA C-acetyltransferase                                                                      | -0.17081   |
| NHL65083.1            | 30S ribosomal protein S4                                                                            | -0.170811  |
| NHL66875.1            | cupredoxin domain-containing protein                                                                | -0.170956  |
| NHL67222.1            | AMIN domain-containing protein                                                                      | -0.173206  |
| NHL65567.1            | methyltransferase domain-containing protein                                                         | -0.17758   |
| NHL67445.1            | formyltetrahydrofolate deformylase                                                                  | -0.178537  |
| NHL66600.1            | 2-dehydropanoate 2-reductase                                                                        | -0.179139  |

|            |                                                                            |           |   |
|------------|----------------------------------------------------------------------------|-----------|---|
| NHL68471.1 | DNA primase                                                                | -0.181815 |   |
| NHL67117.1 | SIMPL domain-containing protein                                            | -0.182507 |   |
| NHL66481.1 | 23S rRNA (adenine(2503)-C(2))-methyltransferase RlmN                       | -0.182704 |   |
| NHL65054.1 | 30S ribosomal protein S7                                                   | -0.183472 |   |
| NHL68563.1 | tryptophan synthase subunit alpha                                          | -0.183908 |   |
| NHL67300.1 | hypothetical protein EIB72_13045                                           | -0.185538 |   |
| NHL66862.1 | fumarate hydratase                                                         | -0.185989 |   |
| NHL67036.1 | glucose-1-phosphate cytidyltransferase                                     | -0.186227 |   |
| NHL67070.1 | inorganic diphosphatase                                                    | -0.186334 |   |
| NHL65715.1 | prephenate dehydratase                                                     | -0.186772 |   |
| NHL65578.1 | UDP-glucose 4-epimerase GalE                                               | -0.186802 |   |
| NHL68976.1 | hypothetical protein EIB72_21545                                           | -0.187468 |   |
| NHL71009.1 | DUF3416 domain-containing protein                                          | -0.187719 |   |
| NHL65425.1 | FAD-binding protein                                                        | -0.188808 |   |
| NHL66990.1 | polyhydroxyalkanoate depolymerase                                          | -0.188231 |   |
| NHL67488.1 | N-acetylglucosamine-6-phosphate deacetylase                                | -0.188247 |   |
| NHL66793.1 | lclR family transcriptional regulator                                      | -0.1883   |   |
| NHL65102.1 | 3-dehydroquinate synthase                                                  | -0.189056 |   |
| NHL67786.1 | peptide deformylase                                                        | -0.18926  |   |
| NHL66989.1 | glycoside hydrolase family 15 protein                                      | -0.189723 |   |
| NHL70601.1 | alpha/beta fold hydrolase                                                  | -0.190464 |   |
| NHL65381.1 | histidine phosphatase family protein                                       | -0.1906   |   |
| NHL68726.1 | 2OG-Fe(II) oxygenase                                                       | -0.190867 |   |
| NHL65082.1 | 30S ribosomal protein S11                                                  | -0.191713 |   |
| NHL67572.1 | methionine synthase                                                        | -0.193154 |   |
| NHL67281.1 | 5-(carboxyamino)imidazole ribonucleotide synthase                          | -0.193551 |   |
| NHL65470.1 | N-acetyltransferase                                                        | -0.19375  |   |
| NHL67790.1 | LysR family transcriptional regulator                                      | -0.194194 |   |
| NHL68392.1 | helix-turn-helix domain-containing protein                                 | -0.194379 |   |
| NHL67009.1 | molecular chaperone HtpG                                                   | -0.195518 |   |
| NHL67034.1 | lipopolysaccharide biosynthesis protein RfbH                               | -0.196146 |   |
| NHL69331.1 | MerR family transcriptional regulator                                      | -0.197034 |   |
| NHL67378.1 | acyl-CoA thioesterase                                                      | -0.197124 |   |
| NHL66572.1 | LysR family transcriptional regulator                                      | -0.198355 |   |
| NHL65360.1 | TetR family transcriptional regulator                                      | -0.198493 |   |
| NHL68159.1 | DUF2760 domain-containing protein                                          | -0.198635 |   |
| NHL65465.1 | UDP-N-acetyl-D-mannosamine dehydrogenase                                   | -0.201007 |   |
| NHL66596.1 | trigger factor                                                             | -0.201137 |   |
| NHL66668.1 | OmpH family outer membrane protein                                         | -0.201417 |   |
| NHL65197.1 | SAM-dependent methyltransferase                                            | -0.203548 |   |
| NHL66555.1 | ankyrin repeat domain-containing protein                                   | -0.203638 |   |
| NHL68569.1 | O-succinylhomoserine sulfhydrylase                                         | -0.205428 |   |
| NHL67212.1 | ornithine carbamoyltransferase                                             | -0.209814 |   |
| NHL67843.1 | glycine C-acetyltransferase                                                | -0.210021 |   |
| NHL67559.1 | biotin-[acetyl-CoA-carboxylase] ligase                                     | -0.210318 |   |
| NHL66768.1 | phosphopyruvate hydratase                                                  | -0.21092  |   |
| NHL67355.1 | PhoH family protein                                                        | -0.211068 |   |
| NHL64964.1 | chemotaxis protein CheA                                                    | -0.211258 |   |
| NHL68557.1 | aspartate-semialdehyde dehydrogenase                                       | -0.211578 |   |
| NHL68445.1 | molybdate ABC transporter substrate-binding protein                        | -0.212179 |   |
| NHL67148.1 | acetylornithine transaminase                                               | -0.213825 |   |
| NHL65002.1 | hypothetical protein EIB72_01090                                           | -0.213899 |   |
| NHL68077.1 | glutamine-fructose-6-phosphate transaminase (isomerizing)                  | -0.21508  |   |
| NHL68854.1 | quinone oxidoreductase                                                     | -0.215569 |   |
| NHL64877.1 | ParA family protein                                                        | -0.215737 |   |
| NHL64983.1 | methylenetetrahydrofolate reductase                                        | -0.216063 |   |
| NHL66593.1 | endopeptidase La                                                           | -0.216422 |   |
| NHL70654.1 | excinuclease ABC subunit UvrA                                              | -0.219563 |   |
| NHL68250.1 | NAD(P)H-dependent oxidoreductase                                           | -0.219778 |   |
| NHL67179.1 | NADP-dependent isocitrate dehydrogenase                                    | -0.22027  | + |
| NHL65751.1 | molybdopterin adenyltransferase                                            | -0.221906 |   |
| NHL66560.1 | folate-binding protein YgfZ                                                | -0.222291 |   |
| NHL65667.1 | YicC family protein                                                        | -0.224251 |   |
| NHL64981.1 | adenosylhomocysteinase                                                     | -0.224635 |   |
| NHL65050.1 | DNA-directed RNA polymerase subunit beta                                   | -0.225089 |   |
| NHL65723.1 | UDP-glucose/GDP-mannose dehydrogenase family protein                       | -0.226643 |   |
| NHL65971.1 | exopolyphosphatase                                                         | -0.228615 |   |
| NHL65692.1 | adenosine deaminase                                                        | -0.22982  |   |
| NHL66380.1 | hypothetical protein EIB72_08270                                           | -0.230023 |   |
| NHL67785.1 | methionyl-tRNA formyltransferase                                           | -0.231031 |   |
| NHL70450.1 | replication initiation protein                                             | -0.231728 |   |
| NHL70800.1 | H-NS histone family protein                                                | -0.231991 |   |
| NHL66739.1 | tetratricopeptide repeat protein                                           | -0.233052 |   |
| NHL69809.1 | NAD(P)H-dependent oxidoreductase                                           | -0.23339  |   |
| NHL65081.1 | 30S ribosomal protein S13                                                  | -0.23347  |   |
| NHL66479.1 | flavodoxin-dependent (E)-4-hydroxy-3-methylbut-2-enyl-diphosphate synthase | -0.233542 |   |
| NHL68997.1 | NADP-dependent oxidoreductase                                              | -0.233751 |   |
| NHL66585.1 | N-acetyltransferase                                                        | -0.234076 |   |
| NHL67999.1 | DUF2322 family protein                                                     | -0.234189 |   |
| NHL66674.1 | ribosome recycling factor                                                  | -0.236034 |   |
| NHL65229.1 | uracil-DNA glycosylase                                                     | -0.237209 |   |
| NHL66531.1 | PhoH family protein                                                        | -0.237736 |   |
| NHL65892.1 | phosphomethylpyrimidine synthase ThiC                                      | -0.23819  | + |
| NHL65085.1 | 50S ribosomal protein L17                                                  | -0.238324 |   |
| NHL66778.1 | peptide chain release factor 2                                             | -0.240547 | + |
| NHL66159.1 | transcription termination/antitermination protein NusA                     | -0.240817 |   |
| NHL67458.1 | HPr kinase/phosphorylase                                                   | -0.242103 |   |
| NHL68950.1 | proline racemase family protein                                            | -0.242598 |   |
| NHL65378.1 | anhydro-N-acetylmuramic acid kinase                                        | -0.242772 |   |
| NHL66757.1 | class I SAM-dependent methyltransferase                                    | -0.242837 |   |
| NHL64861.1 | Lrp/AsnC family transcriptional regulator                                  | -0.243217 |   |
| NHL66475.1 | ribosome biogenesis GTPase Der                                             | -0.245165 |   |
| NHL66255.1 | sulfate ABC transporter substrate-binding protein                          | -0.24641  |   |
| NHL67744.1 | RNA polymerase-binding protein DksA                                        | -0.249939 |   |
| NHL65375.1 | 50S ribosomal protein L13                                                  | -0.250902 |   |
| NHL66786.1 | Fe-S cluster assembly scaffold IscU                                        | -0.251918 |   |
| NHL67133.1 | nitrite/sulfite reductase                                                  | -0.252502 |   |
| NHL67466.1 | ribose-phosphate pyrophosphokinase                                         | -0.255229 |   |

|                       |                                                                                               |           |   |
|-----------------------|-----------------------------------------------------------------------------------------------|-----------|---|
| NHL65345.1            | ferric iron uptake transcriptional regulator                                                  | -0.255882 |   |
| NHL68568.1            | amidophosphoribosyltransferase                                                                | -0.256269 |   |
| NHL69869.1            | TetR/AcrR family transcriptional regulator                                                    | -0.257278 |   |
| NHL65561.1            | glucose-1-phosphate thymidyltransferase RfbA                                                  | -0.259172 |   |
| NHL66928.1            | ketol-acid reductoisomerase                                                                   | -0.259277 |   |
| NHL68460.1            | sulfurtransferase                                                                             | -0.260408 |   |
| NHL67768.1            | Asp-tRNA(Asn)/Glu-tRNA(Gln) amidotransferase subunit GatC                                     | -0.26059  |   |
| NHL65733.1            | MetQ/NlpA family ABC transporter substrate-binding protein                                    | -0.261204 |   |
| NHL64886.1            | FOF1 ATP synthase subunit gamma                                                               | -0.262881 |   |
| NHL65467.1            | heparinase                                                                                    | -0.264617 |   |
| NHL71023.1            | DUF1488 domain-containing protein                                                             | -0.265875 |   |
| NHL67265.1            | efflux transporter outer membrane subunit                                                     | -0.265993 |   |
| NHL66686.1            | succinyldiaminopimelate transaminase                                                          | -0.270065 |   |
| NHL68093.1            | CsbD family protein                                                                           | -0.270363 |   |
| NHL67383.1            | 3-hydroxyacyl-CoA dehydrogenase/enoyl-CoA hydratase family protein                            | -0.271605 |   |
| NHL66787.1            | IscS subfamily cysteine desulfurase                                                           | -0.272646 |   |
| NHL64923.1            | L-serine ammonia-lyase                                                                        | -0.274045 |   |
| NHL68949.1            | branched-chain amino acid ABC transporter substrate-binding protein                           | -0.275241 |   |
| NHL65713.1            | DUF2059 domain-containing protein                                                             | -0.275777 |   |
| NHL66740.1            | peptidyl-prolyl cis-trans isomerase                                                           | -0.276576 |   |
| NHL66228.1            | tRNA dihydrouridine(20/20a) synthase DusA                                                     | -0.276814 | + |
| NHL67092.1            | methionine-tRNA ligase                                                                        | -0.277174 | + |
| NHL66191.1            | RNA chaperone Hfq                                                                             | -0.27739  |   |
| NHL66912.1            | NADH-quinone oxidoreductase subunit D                                                         | -0.277828 |   |
| NHL65568.1            | glycosyltransferase                                                                           | -0.278547 |   |
| NHL69251.1;NHL68986.1 | universal stress protein                                                                      | -0.279622 |   |
| NHL67521.1            | phosphoenolpyruvate-protein phosphotransferase                                                | -0.281485 |   |
| NHL70150.1            | DUF480 domain-containing protein                                                              | -0.282502 |   |
| NHL70560.1            | hypothetical protein EIB72_29755                                                              | -0.284754 |   |
| NHL65074.1            | 50S ribosomal protein L18                                                                     | -0.28586  |   |
| NHL67382.1            | acetyl-CoA C-acyltransferase                                                                  | -0.286053 |   |
| NHL66669.1            | outer membrane protein assembly factor BamA                                                   | -0.286256 |   |
| NHL68122.1            | chaperonin GroEL                                                                              | -0.287831 |   |
| NHL65675.1            | DNA polymerase III subunit epsilon                                                            | -0.287868 |   |
| NHL67187.1            | GntR family transcriptional regulator                                                         | -0.288022 | + |
| NHL68185.1            | putative addiction module antidote protein                                                    | -0.289434 |   |
| NHL70133.1            | hypothetical protein EIB72_27525                                                              | -0.28945  |   |
| NHL68457.1            | DNA polymerase I                                                                              | -0.289755 |   |
| NHL65391.1            | glutathione S-transferase                                                                     | -0.289805 |   |
| NHL70372.1            | hypothetical protein EIB72_28750                                                              | -0.289892 |   |
| NHL66878.1            | aspartate/tyrosine/aromatic aminotransferase                                                  | -0.29052  | + |
| NHL66801.1            | bifunctional methylenetetrahydrofolate dehydrogenase/methylenetetrahydrofolate cyclohydrolase | -0.291194 |   |
| NHL66921.1            | branched-chain amino acid ABC transporter substrate-binding protein                           | -0.291665 |   |
| NHL65719.1            | 30S ribosomal protein S1                                                                      | -0.2929   | + |
| NHL67371.1            | molecular chaperone SurA                                                                      | -0.292988 |   |
| NHL66863.1            | bacterioferritin                                                                              | -0.293562 |   |
| NHL70672.1            | DUF3696 domain-containing protein                                                             | -0.295039 |   |
| NHL67167.1            | phosphoribosylglycinamide formyltransferase                                                   | -0.297091 |   |
| NHL67583.1            | carbonate dehydratase                                                                         | -0.297619 |   |
| NHL65237.1            | Co2+/Mg2+ efflux protein ApaG                                                                 | -0.297838 |   |
| NHL65138.1            | phosphoribosyl-AMP cyclohydrolase                                                             | -0.298542 |   |
| NHL70718.1            | S-(hydroxymethyl)glutathione dehydrogenase/class III alcohol dehydrogenase                    | -0.299007 |   |
| NHL65646.1            | outer membrane lipoprotein chaperone LolA                                                     | -0.300199 |   |
| NHL66066.1            | alpha/beta hydrolase                                                                          | -0.302396 |   |
| NHL65811.1            | sigma-54-dependent Fis family transcriptional regulator                                       | -0.3034   |   |
| NHL65129.1            | UDP-N-acetylglucosamine 1-carboxyvinyltransferase                                             | -0.303972 |   |
| NHL65072.1            | 30S ribosomal protein S8                                                                      | -0.304959 |   |
| NHL68375.1            | acetolactate synthase large subunit                                                           | -0.305929 |   |
| NHL65262.1            | cell division protein FtsA                                                                    | -0.306081 |   |
| NHL65312.1            | shikimate dehydrogenase                                                                       | -0.306697 |   |
| NHL67144.1            | 16S rRNA pseudouridine(516) synthase                                                          | -0.307943 | + |
| NHL65376.1            | 30S ribosomal protein S9                                                                      | -0.30817  |   |
| NHL64888.1            | FOF1 ATP synthase subunit epsilon                                                             | -0.309828 |   |
| NHL70670.1            | DEAD/DEAH box helicase                                                                        | -0.311956 |   |
| NHL65605.1            | tRNA (guanosine(46)-N7)-methyltransferase TrmB                                                | -0.312407 |   |
| NHL66958.1            | uracil phosphoribosyltransferase                                                              | -0.312641 |   |
| NHL66282.1            | fimbrial protein                                                                              | -0.314107 |   |
| NHL65060.1            | 50S ribosomal protein L23                                                                     | -0.314128 |   |
| NHL65203.1            | cold-shock protein                                                                            | -0.314342 |   |
| NHL65383.1            | Holliday junction branch migration DNA helicase RuvB                                          | -0.315656 |   |
| NHL65071.1            | 30S ribosomal protein S14                                                                     | -0.316593 |   |
| NHL67363.1            | glycine-tRNA ligase subunit beta                                                              | -0.317435 |   |
| NHL67743.1            | GTP-binding protein                                                                           | -0.31835  |   |
| NHL70821.1            | helicase                                                                                      | -0.318619 |   |
| NHL65668.1            | guanylate kinase                                                                              | -0.319349 |   |
| NHL67132.1            | DUF934 domain-containing protein                                                              | -0.321641 |   |
| NHL67778.1            | 7-cyano-7-deazaguanine synthase QueC                                                          | -0.324593 |   |
| NHL71148.1            | galactose mutarotase                                                                          | -0.325342 |   |
| NHL68525.1            | succinate dehydrogenase flavoprotein subunit                                                  | -0.326206 |   |
| NHL67033.1            | NAD-dependent epimerase/dehydratase family protein                                            | -0.32669  | + |
| NHL65963.1            | phosphate ABC transporter substrate-binding protein PstS                                      | -0.327138 |   |
| NHL66324.1            | precorrin-8X methylmutase                                                                     | -0.328604 |   |
| NHL68470.1            | GatB/YqeY domain-containing protein                                                           | -0.329506 |   |
| NHL67828.1            | ATP-binding protein                                                                           | -0.333234 |   |
| NHL68462.1            | exodeoxyribonuclease VII small subunit                                                        | -0.333303 |   |
| NHL67114.1            | ATPase                                                                                        | -0.333944 |   |
| NHL67782.1            | 16S rRNA (cytosine(967)-C(5))-methyltransferase RsmB                                          | -0.334243 |   |
| NHL65048.1            | 50S ribosomal protein L10                                                                     | -0.334458 |   |
| NHL65961.1            | dihydropteroate synthase                                                                      | -0.33488  |   |
| NHL70106.1            | H-NS histone family protein                                                                   | -0.337802 |   |
| NHL68564.1            | acetyl-CoA carboxylase carboxyltransferase subunit beta                                       | -0.338075 | + |
| NHL66661.1            | kinase/pyrophosphorylase                                                                      | -0.338243 |   |
| NHL70027.1            | MetQ/NlpA family lipoprotein                                                                  | -0.339947 |   |
| NHL68783.1            | acyl carrier protein                                                                          | -0.340529 |   |
| NHL66815.1            | beta-propeller fold lactonase family protein                                                  | -0.341495 |   |
| NHL66500.1            | type B 50S ribosomal protein L31                                                              | -0.341985 |   |
| NHL66892.1            | pyridoxal phosphate-dependent aminotransferase                                                | -0.34367  |   |
| NHL68509.1            | ABC transporter substrate-binding protein                                                     | -0.345069 |   |

|            |                                                                     |           |   |
|------------|---------------------------------------------------------------------|-----------|---|
| NHL67516.1 | glutaredoxin 3                                                      | -0.346093 |   |
| NHL66755.1 | outer membrane protein assembly factor BamC                         | -0.346099 |   |
| NHL66157.1 | pseudouridine synthase                                              | -0.346773 |   |
| NHL66967.1 | DUF469 family protein                                               | -0.346896 |   |
| NHL64844.1 | hypothetical protein EIB72_24220                                    | -0.348634 |   |
| NHL64891.1 | uroporphyrinogen decarboxylase                                      | -0.348655 |   |
| NHL67769.1 | rod shape-determining protein                                       | -0.349682 |   |
| NHL66617.1 | transcription-repair coupling factor                                | -0.349764 |   |
| NHL65828.1 | copper chaperone PCu(A)C                                            | -0.351052 |   |
| NHL65123.1 | VacJ family lipoprotein                                             | -0.351739 |   |
| NHL66769.1 | 3-deoxy-8-phosphooctulonate synthase                                | -0.352969 | + |
| NHL69756.1 | hypothetical protein EIB72_25595                                    | -0.353267 |   |
| NHL66784.1 | Fe-S protein assembly co-chaperone HscB                             | -0.356021 |   |
| NHL67367.1 | lactoylglutathione lyase                                            | -0.35699  |   |
| NHL67839.1 | DNA-binding protein                                                 | -0.357019 |   |
| NHL66749.1 | DNA mismatch repair protein MutS                                    | -0.358601 |   |
| NHL65430.1 | 3-deoxy-7-phosphoheptulonate synthase AroG                          | -0.359637 | + |
| NHL67812.1 | YaeQ family protein                                                 | -0.359907 |   |
| NHL65379.1 | tyrosine-tRNA ligase                                                | -0.360043 |   |
| NHL66469.1 | ATP phosphoribosyltransferase regulatory subunit                    | -0.360227 |   |
| NHL65477.1 | SDR family NAD(P)-dependent oxidoreductase                          | -0.361279 |   |
| NHL66062.1 | hypothetical protein EIB72_06645                                    | -0.362209 |   |
| NHL65154.1 | type VI secretion system tip protein VgrG                           | -0.362457 |   |
| NHL66788.1 | Fe-S cluster assembly transcriptional regulator IscR                | -0.364172 |   |
| NHL66808.1 | nitrogen regulation protein NR(I)                                   | -0.364711 |   |
| NHL65330.1 | NADP-dependent malic enzyme                                         | -0.365937 |   |
| NHL65250.1 | 16S rRNA (cytosine(1402)-N(4))-methyltransferase RsmH               | -0.368787 |   |
| NHL65754.1 | dihydrofolate reductase                                             | -0.36927  |   |
| NHL67202.1 | exodeoxyribonuclease VII large subunit                              | -0.370495 |   |
| NHL70306.1 | transporter substrate-binding domain-containing protein             | -0.371055 |   |
| NHL65070.1 | 50S ribosomal protein L5                                            | -0.371086 | + |
| NHL66741.1 | peptidyl-prolyl cis-trans isomerase                                 | -0.371419 | + |
| NHL65350.1 | leucine-tRNA ligase                                                 | -0.374437 | + |
| NHL67707.1 | ferredoxin-NADP reductase                                           | -0.374709 |   |
| NHL69518.1 | DUF1653 domain-containing protein                                   | -0.377422 |   |
| NHL65955.1 | carbamoyl-phosphate synthase large subunit                          | -0.377426 | + |
| NHL67638.1 | glutamine-fructose-6-phosphate transaminase (isomerizing)           | -0.377804 | + |
| NHL67157.1 | peptidylprolyl isomerase                                            | -0.377937 | + |
| NHL67576.1 | thiol:disulfide interchange protein DsbA/DsbL                       | -0.379632 |   |
| NHL70132.1 | hypothetical protein EIB72_27520                                    | -0.380013 |   |
| NHL66486.1 | 3-5 exonuclease                                                     | -0.380735 |   |
| NHL70417.1 | Zn-dependent hydrolase                                              | -0.381055 |   |
| NHL68777.1 | polyphosphate kinase 2                                              | -0.38338  |   |
| NHL66557.1 | DNA polymerase III subunit delta                                    | -0.384219 |   |
| NHL70889.1 | TauD/TtdA family dioxygenase                                        | -0.384377 |   |
| NHL67022.1 | DNA topoisomerase IV subunit A                                      | -0.385628 |   |
| NHL65988.1 | homocitrate synthase                                                | -0.386718 |   |
| NHL65725.1 | ADP-glyceromanno-heptose 6-epimerase                                | -0.386959 |   |
| NHL65808.1 | pyridoxine 5-phosphate synthase                                     | -0.387035 |   |
| NHL66838.1 | histidine ammonia-lyase                                             | -0.388395 |   |
| NHL67486.1 | phosphoenolpyruvate-protein phosphotransferase                      | -0.389036 | + |
| NHL65399.1 | class I SAM-dependent RNA methyltransferase                         | -0.390891 |   |
| NHL67024.1 | ATP-binding cassette domain-containing protein                      | -0.392685 |   |
| NHL65599.1 | protein-L-isoaspartate O-methyltransferase                          | -0.393212 |   |
| NHL69393.1 | DUF4902 domain-containing protein                                   | -0.393273 |   |
| NHL66100.1 | valine-tRNA ligase                                                  | -0.394598 | + |
| NHL65068.1 | 50S ribosomal protein L14                                           | -0.394862 | + |
| NHL65057.1 | 30S ribosomal protein S10                                           | -0.395571 |   |
| NHL65464.1 | UDP-N-acetylglucosamine 2-epimerase (non-hydrolyzing)               | -0.396645 |   |
| NHL65286.1 | proline-tRNA ligase                                                 | -0.39673  |   |
| NHL66738.1 | cysteine-tRNA ligase                                                | -0.397642 |   |
| NHL67733.1 | phytanoyl-CoA dioxygenase family protein                            | -0.399706 |   |
| NHL67567.1 | fumarylacetoacetate hydrolase family protein                        | -0.400177 |   |
| NHL65582.1 | phosphomannomutase/phosphoglucomutase                               | -0.400581 |   |
| NHL67636.1 | tRNA 2-thiocytidine(32) synthetase TtcA                             | -0.401045 |   |
| NHL67273.1 | carboxypeptidase regulatory-like domain-containing protein          | -0.401155 |   |
| NHL65111.1 | glutamate synthase subunit alpha                                    | -0.401557 | + |
| NHL71013.1 | malto-oligosyltrehalose trehalohydrolase                            | -0.401557 |   |
| NHL65224.1 | redox-regulated ATPase YchF                                         | -0.402868 | + |
| NHL66985.1 | formate-dependent phosphoribosylglycinamide formyltransferase       | -0.403404 |   |
| NHL65047.1 | 50S ribosomal protein L1                                            | -0.406636 |   |
| NHL67129.1 | sulfate adenyltransferase subunit 1                                 | -0.407043 |   |
| NHL64998.1 | SIS domain-containing protein                                       | -0.407059 |   |
| NHL65051.1 | DNA-directed RNA polymerase subunit beta                            | -0.408311 | + |
| NHL69658.1 | branched-chain amino acid ABC transporter substrate-binding protein | -0.410077 |   |
| NHL67284.1 | fructose-bisphosphate aldolase class II                             | -0.411832 | + |
| NHL67077.1 | phosphoenolpyruvate carboxylase                                     | -0.413006 |   |
| NHL65061.1 | 50S ribosomal protein L2                                            | -0.413729 | + |
| NHL65962.1 | phosphoglucomutase                                                  | -0.416082 |   |
| NHL67023.1 | type IIA DNA topoisomerase subunit B                                | -0.417725 |   |
| NHL67123.1 | DNA polymerase III subunit chi                                      | -0.417782 |   |
| NHL65267.1 | preprotein translocase subunit SecA                                 | -0.419893 |   |
| NHL66138.1 | translation initiation factor IF-3                                  | -0.420261 | + |
| NHL65649.1 | serine-tRNA ligase                                                  | -0.421939 | + |
| NHL67688.1 | lytic transglycosylase domain-containing protein                    | -0.422032 |   |
| NHL65814.1 | excinuclease ABC subunit UvrC                                       | -0.423381 |   |
| NHL70452.1 | ParA family protein                                                 | -0.427263 |   |
| NHL66736.1 | acetyl-CoA carboxylase carboxyltransferase subunit alpha            | -0.428084 |   |
| NHL67031.1 | transketolase                                                       | -0.429081 |   |
| NHL66446.1 | phosphoserine phosphatase SerB                                      | -0.430431 | + |
| NHL66930.1 | acetolactate synthase 3 catalytic subunit                           | -0.430527 | + |
| NHL65819.1 | N-acetyltransferase                                                 | -0.430601 |   |
| NHL65263.1 | cell division protein FtsZ                                          | -0.430733 | + |
| NHL70131.1 | type VI secretion system tip protein VgrG                           | -0.431768 | + |
| NHL66209.1 | ribose-5-phosphate isomerase RpiA                                   | -0.431796 |   |
| NHL65812.1 | elongation factor P                                                 | -0.433322 |   |
| NHL65625.1 | pyridoxal phosphate-dependent aminotransferase                      | -0.433734 |   |
| NHL68734.1 | dihydroxy-acid dehydratase                                          | -0.435138 |   |



|            |                                                                                                            |           |   |
|------------|------------------------------------------------------------------------------------------------------------|-----------|---|
| NHL67543.1 | lipoyl synthase                                                                                            | -0.436459 |   |
| NHL69394.1 | GNAT family N-acetyltransferase                                                                            | -0.436874 |   |
| NHL70104.1 | hypothetical protein EIB72_27380                                                                           | -0.437122 |   |
| NHL65947.1 | DNA polymerase III subunit epsilon                                                                         | -0.437126 |   |
| NHL67776.1 | 6-carboxytetrahydropterin synthase QueD                                                                    | -0.438435 |   |
| NHL66099.1 | UTP--glucose-1-phosphate uridylyltransferase GalU                                                          | -0.438515 |   |
| NHL65311.1 | RNB domain-containing ribonuclease                                                                         | -0.440056 |   |
| NHL65959.1 | RlmE family RNA methyltransferase                                                                          | -0.440822 |   |
| NHL66263.1 | substrate-binding domain-containing protein                                                                | -0.441807 |   |
| NHL66671.1 | 1-deoxy-D-xylulose-5-phosphate reductoisomerase                                                            | -0.442383 |   |
| NHL67375.1 | AAA family ATPase                                                                                          | -0.442584 |   |
| NHL64852.1 | winged helix-turn-helix transcriptional regulator                                                          | -0.443394 |   |
| NHL66484.1 | 23S rRNA (uracil(1939)-C(5))-methyltransferase RlmD                                                        | -0.444188 |   |
| NHL66584.1 | peptidylprolyl isomerase                                                                                   | -0.444236 | + |
| NHL65063.1 | 50S ribosomal protein L22                                                                                  | -0.445708 |   |
| NHL66141.1 | phenylalanine--tRNA ligase subunit alpha                                                                   | -0.4459   |   |
| NHL66677.1 | 30S ribosomal protein S2                                                                                   | -0.446072 |   |
| NHL66586.1 | phosphoribosylformylglycinamide synthase                                                                   | -0.446143 | + |
| NHL67374.1 | nucleotidyltransferase family protein                                                                      | -0.446261 |   |
| NHL66864.1 | glutamate racemase                                                                                         | -0.449291 |   |
| NHL69945.1 | putative multidrug efflux transcriptional regulator CeoR                                                   | -0.450002 |   |
| NHL67830.1 | hypothetical protein EIB72_15720                                                                           | -0.450017 |   |
| NHL71073.1 | SDR family oxidoreductase                                                                                  | -0.451366 |   |
| NHL66451.1 | hypothetical protein EIB72_08635                                                                           | -0.451992 |   |
| NHL65788.1 | septum formation protein Maf                                                                               | -0.452574 | + |
| NHL67169.1 | isoleucine--tRNA ligase                                                                                    | -0.453685 |   |
| NHL65058.1 | 50S ribosomal protein L3                                                                                   | -0.459394 | + |
| NHL66142.1 | phenylalanine--tRNA ligase subunit beta                                                                    | -0.46147  |   |
| NHL69171.1 | cysteine hydrolase                                                                                         | -0.461765 |   |
| NHL65045.1 | transcription termination/antitermination protein NusG                                                     | -0.462476 |   |
| NHL65431.1 | metalloprotease TldD                                                                                       | -0.462554 |   |
| NHL70976.1 | BON domain-containing protein                                                                              | -0.462895 |   |
| NHL71079.1 | four-helix bundle copper-binding protein                                                                   | -0.463627 |   |
| NHL68396.1 | NADP-dependent oxidoreductase                                                                              | -0.464281 |   |
| NHL67467.1 | 50S ribosomal protein L25/general stress protein Ctc                                                       | -0.464987 |   |
| NHL66770.1 | CTP synthase                                                                                               | -0.465045 | + |
| NHL67134.1 | CysB family HTH-type transcriptional regulator                                                             | -0.465158 |   |
| NHL70308.1 | catalase/peroxidase HPI                                                                                    | -0.46709  | + |
| NHL67831.1 | DNA cytosine methyltransferase                                                                             | -0.4671   |   |
| NHL65179.1 | type VI secretion system baseplate subunit TssE                                                            | -0.467333 |   |
| NHL65243.1 | phenylacetic acid degradation protein PaaN                                                                 | -0.468395 |   |
| NHL66478.1 | histidine--tRNA ligase                                                                                     | -0.469737 |   |
| NHL66068.1 | alanine--tRNA ligase                                                                                       | -0.47132  | + |
| NHL65270.1 | NUDIX domain-containing protein                                                                            | -0.471456 |   |
| NHL71058.1 | SDR family oxidoreductase                                                                                  | -0.471885 |   |
| NHL64893.1 | trifunctional transcriptional regulator/proline dehydrogenase/L-glutamate gamma-semialdehyde dehydrogenase | -0.473337 | + |
| NHL66696.1 | alanine racemase                                                                                           | -0.474749 |   |
| NHL69572.1 | hypothetical protein EIB72_24665                                                                           | -0.47577  | + |
| NHL67147.1 | CDP-6-deoxy-delta-3,4-glucoseen reductase                                                                  | -0.476262 |   |
| NHL65862.1 | SDR family oxidoreductase                                                                                  | -0.476471 |   |
| NHL65953.1 | glutamine-hydrolyzing carbamoyl-phosphate synthase small subunit                                           | -0.47915  |   |
| NHL67330.1 | c-type cytochrome                                                                                          | -0.479801 |   |
| NHL70673.1 | DUF262 domain-containing protein                                                                           | -0.47987  |   |
| NHL66890.1 | peroxide stress protein YaaA                                                                               | -0.480212 |   |
| NHL65202.1 | Hsp70 family protein                                                                                       | -0.480396 |   |
| NHL66689.1 | succinyl-diaminopimelate desuccinylase                                                                     | -0.482875 | + |
| NHL67283.1 | phosphoribosylaminoimidazolesuccinocarboxamide synthase                                                    | -0.487102 | + |
| NHL67183.1 | DUF192 domain-containing protein                                                                           | -0.489915 |   |
| NHL68646.1 | DUF4397 domain-containing protein                                                                          | -0.490431 |   |
| NHL68910.1 | hypothetical protein EIB72_21215                                                                           | -0.491984 |   |
| NHL65782.1 | Rne/Rng family ribonuclease                                                                                | -0.492003 | + |
| NHL66537.1 | 30S ribosomal protein S18                                                                                  | -0.492071 | + |
| NHL66258.1 | sulfate ABC transporter ATP-binding protein                                                                | -0.493983 |   |
| NHL67168.1 | bifunctional riboflavin kinase/FAD synthetase                                                              | -0.494716 |   |
| NHL67296.1 | cyclic pyranopterin monophosphate synthase MoaC                                                            | -0.494775 |   |
| NHL66435.1 | FRG domain-containing protein                                                                              | -0.496369 |   |
| NHL66779.1 | lysine--tRNA ligase                                                                                        | -0.50249  |   |
| NHL66494.1 | DNA polymerase III subunit gamma/tau                                                                       | -0.504328 |   |
| NHL68552.1 | 3-isopropylmalate dehydratase large subunit                                                                | -0.504461 | + |
| NHL64935.1 | VRR-NUC domain-containing protein                                                                          | -0.510056 |   |
| NHL65569.1 | GDP-mannose 4,6-dehydratase                                                                                | -0.510393 | + |
| NHL66520.1 | homoserine dehydrogenase                                                                                   | -0.511056 |   |
| NHL66259.1 | CysB family HTH-type transcriptional regulator                                                             | -0.51151  |   |
| NHL66693.1 | ATP-binding cassette domain-containing protein                                                             | -0.512021 |   |
| NHL65294.1 | ribonucleoside-diphosphate reductase subunit alpha                                                         | -0.514999 | + |
| NHL68645.1 | DUF3005 domain-containing protein                                                                          | -0.515879 |   |
| NHL67518.1 | 2,3-diphosphoglycerate-dependent phosphoglycerate mutase                                                   | -0.518202 | + |
| NHL65066.1 | 50S ribosomal protein L29                                                                                  | -0.518262 | + |
| NHL65444.1 | molecular chaperone DnaJ                                                                                   | -0.518606 |   |
| NHL67829.1 | hypothetical protein EIB72_15715                                                                           | -0.520878 | + |
| NHL65790.1 | 50S ribosomal protein L32                                                                                  | -0.52155  |   |
| NHL66556.1 | TatD family hydrolase                                                                                      | -0.522924 | + |
| NHL65353.1 | glutamate-5-semialdehyde dehydrogenase                                                                     | -0.523122 |   |
| NHL66161.1 | 30S ribosome-binding factor RbfA                                                                           | -0.524    |   |
| NHL65387.1 | Fis family transcriptional regulator                                                                       | -0.524068 |   |
| NHL67390.1 | zinc ribbon domain-containing protein                                                                      | -0.525422 |   |
| NHL65046.1 | 50S ribosomal protein L11                                                                                  | -0.526795 | + |
| NHL67364.1 | D-glycero-beta-D-manno-heptose 1,7-bisphosphate 7-phosphatase                                              | -0.527085 |   |
| NHL65327.1 | CinA family protein                                                                                        | -0.52737  |   |
| NHL70130.1 | phage tail protein                                                                                         | -0.532252 | + |
| NHL67205.1 | 3-deoxy-manno-octulosonate cytidylyltransferase                                                            | -0.532782 |   |
| NHL65806.1 | GTPase Era                                                                                                 | -0.534023 |   |
| NHL68717.1 | ATP-dependent protease                                                                                     | -0.536372 |   |
| NHL65686.1 | class 1 fructose-bisphosphatase                                                                            | -0.539606 | + |
| NHL67361.1 | tetratricopeptide repeat protein                                                                           | -0.54936  |   |
| NHL66207.1 | 23S rRNA (guanosine(2251)-2-O)-methyltransferase RlmB                                                      | -0.550713 |   |
| NHL69620.1 | hypothetical protein EIB72_24905                                                                           | -0.552496 |   |
| NHL67764.1 | exodeoxyribonuclease III                                                                                   | -0.554219 |   |

|            |                                                                                           |           |   |
|------------|-------------------------------------------------------------------------------------------|-----------|---|
| NHL65284.1 | RNA pyrophosphohydrolase                                                                  | -0.554885 |   |
| NHL67282.1 | 5-(carboxyamino)imidazole ribonucleotide mutase                                           | -0.555204 |   |
| NHL67335.1 | DeoR/GlpR transcriptional regulator                                                       | -0.557427 |   |
| NHL65253.1 | UDP-N-acetylmuramoyl-L-alanyl-D-glutamate--2,6-diaminopimelate ligase                     | -0.557486 |   |
| NHL67198.1 | hypothetical protein EIB72_12535                                                          | -0.559541 |   |
| NHL66395.1 | MerR family transcriptional regulator                                                     | -0.560327 |   |
| NHL66171.1 | cell division protein ZapE                                                                | -0.560977 |   |
| NHL66657.1 | SsrA-binding protein SmpB                                                                 | -0.561234 |   |
| NHL67621.1 | alpha/beta hydrolase                                                                      | -0.561416 |   |
| NHL65452.1 | phosphoribosylformylglycinamide cyclo-ligase                                              | -0.562325 |   |
| NHL65876.1 | NAD(P)H-binding protein                                                                   | -0.56461  |   |
| NHL69466.1 | Arc family DNA-binding protein                                                            | -0.57173  |   |
| NHL65810.1 | beta-N-acetylhexosaminidase                                                               | -0.573714 | + |
| NHL66982.1 | DEAD/DEAH box helicase                                                                    | -0.575244 | + |
| NHL65787.1 | SAM-dependent methyltransferase                                                           | -0.576843 |   |
| NHL67297.1 | type VI secretion system tip protein VgrG                                                 | -0.576942 | + |
| NHL66465.1 | RNA-binding transcriptional accessory protein                                             | -0.5773   |   |
| NHL65205.1 | dioxygenase                                                                               | -0.578767 |   |
| NHL67204.1 | Trm112 family protein                                                                     | -0.578962 |   |
| NHL66960.1 | phosphoribosylamine-glycine ligase                                                        | -0.5815   |   |
| NHL65817.1 | hypothetical protein EIB72_05375                                                          | -0.581659 |   |
| NHL66678.1 | type I methionyl aminopeptidase                                                           | -0.58412  | + |
| NHL65272.1 | cell division protein ZapD                                                                | -0.585979 |   |
| NHL65731.1 | methionine ABC transporter ATP-binding protein                                            | -0.589891 |   |
| NHL66687.1 | 2,3,4,5-tetrahydropyridine-2,6-dicarboxylate N-succinyltransferase                        | -0.59117  | + |
| NHL66961.1 | oxygen-dependent coproporphyrinogen oxidase                                               | -0.591217 |   |
| NHL67331.1 | DEAD/DEAH box helicase                                                                    | -0.592107 |   |
| NHL65213.1 | aminopeptidase P family protein                                                           | -0.592453 |   |
| NHL66536.1 | 50S ribosomal protein L9                                                                  | -0.595726 | + |
| NHL68378.1 | HAMP domain-containing histidine kinase                                                   | -0.596413 |   |
| NHL66869.1 | LysR family transcriptional regulator                                                     | -0.599415 | + |
| NHL65226.1 | DsbC family protein                                                                       | -0.599684 |   |
| NHL66167.1 | translational GTPase TypA                                                                 | -0.600686 |   |
| NHL67401.1 | NADPH-dependent 7-cyano-7-deazaguanine reductase QueF                                     | -0.601252 |   |
| NHL66871.1 | DUF1857 family protein                                                                    | -0.60393  |   |
| NHL67213.1 | UDP-N-acetylmuramate dehydrogenase                                                        | -0.605465 |   |
| NHL67131.1 | phosphoadenylyl-sulfate reductase                                                         | -0.606588 |   |
| NHL69464.1 | aspartate carbamoyltransferase                                                            | -0.610907 | + |
| NHL65150.1 | glutathione S-transferase                                                                 | -0.612889 |   |
| NHL65065.1 | 50S ribosomal protein L16                                                                 | -0.613027 |   |
| NHL65744.1 | 50S ribosomal protein L19                                                                 | -0.617872 | + |
| NHL67566.1 | enoyl-CoA hydratase/isomerase family protein                                              | -0.61861  |   |
| NHL65386.1 | bifunctional phosphoribosylaminoimidazolecarboxamide formyltransferase/IMP cyclohydrolase | -0.627487 | + |
| NHL66639.1 | tRNA adenosine(34) deaminase TadA                                                         | -0.62781  |   |
| NHL68293.1 | argininosuccinate synthase                                                                | -0.628132 | + |
| NHL65069.1 | 50S ribosomal protein L24                                                                 | -0.629512 |   |
| NHL66160.1 | translation initiation factor IF-2                                                        | -0.631419 |   |
| NHL65028.1 | orotate phosphoribosyltransferase                                                         | -0.637381 |   |
| NHL66169.1 | 2-oxoglutarate dehydrogenase complex dihydrolipoyllysine-residue succinyltransferase      | -0.639175 | + |
| NHL66214.1 | quinone-dependent dihydroorotate dehydrogenase                                            | -0.640748 | + |
| NHL70137.1 | adenosyl-hopene transferase HpnH                                                          | -0.64169  | + |
| NHL66170.1 | dihydrolipoyl dehydrogenase                                                               | -0.643198 | + |
| NHL67388.1 | aspartate--tRNA ligase                                                                    | -0.64365  | + |
| NHL66035.1 | bifunctional alpha/beta hydrolase/class I SAM-dependent methyltransferase                 | -0.645072 |   |
| NHL67276.1 | response regulator                                                                        | -0.647811 |   |
| NHL66965.1 | septum formation inhibitor Maf                                                            | -0.65538  |   |
| NHL69919.1 | DUF2167 domain-containing protein                                                         | -0.657019 |   |
| NHL71031.1 | catalse HPII                                                                              | -0.658463 |   |
| NHL65029.1 | NADP-dependent malic enzyme                                                               | -0.659428 | + |
| NHL71055.1 | glucose 1-dehydrogenase                                                                   | -0.660424 |   |
| NHL65362.1 | adenylosuccinate lyase                                                                    | -0.661016 | + |
| NHL66140.1 | 50S ribosomal protein L20                                                                 | -0.662329 |   |
| NHL67514.1 | NAD(P)-dependent glycerol-3-phosphate dehydrogenase                                       | -0.662361 |   |
| NHL66673.1 | di-trans,poly-cis-decaprenylcistransferase                                                | -0.662739 |   |
| NHL70986.1 | TetR/AcrR family transcriptional regulator                                                | -0.664031 |   |
| NHL67292.1 | nuclear transport factor 2 family protein                                                 | -0.665399 |   |
| NHL65781.1 | GTP 3,8-cyclase MoaA                                                                      | -0.668512 |   |
| NHL67575.1 | cell division protein                                                                     | -0.668695 |   |
| NHL65304.1 | acetyl-CoA carboxylase biotin carboxylase subunit                                         | -0.66904  | + |
| NHL70567.1 | GntR family transcriptional regulator                                                     | -0.670214 |   |
| NHL67026.1 | rubredoxin                                                                                | -0.671117 |   |
| NHL70451.1 | ParB/RepB/SpoJ family partition protein                                                   | -0.677198 | + |
| NHL68870.1 | porin                                                                                     | -0.679356 |   |
| NHL65413.1 | tRNA preQ1(34) S-adenosylmethionine ribosyltransferase-isomerase QueA                     | -0.68025  | + |
| NHL67528.1 | accessory factor Ubik family protein                                                      | -0.683073 |   |
| NHL65858.1 | ABC transporter substrate-binding protein                                                 | -0.68331  |   |
| NHL68389.1 | Dyp-type peroxidase                                                                       | -0.68993  | + |
| NHL64952.1 | 30S ribosomal protein S21                                                                 | -0.69309  |   |
| NHL65073.1 | 50S ribosomal protein L6                                                                  | -0.696531 | + |
| NHL67660.1 | hypothetical protein EIB72_14855                                                          | -0.699242 |   |
| NHL66683.1 | cell division protein FtsZ                                                                | -0.699584 |   |
| NHL65175.1 | tetratricopeptide repeat protein                                                          | -0.701633 | + |
| NHL67888.1 | GTP cyclohydrolase I FolE                                                                 | -0.704826 |   |
| NHL65235.1 | phosphoglycolate phosphatase                                                              | -0.707125 |   |
| NHL65556.1 | aspartate carbamoyltransferase catalytic subunit                                          | -0.707775 | + |
| NHL66663.1 | ribonuclease HII                                                                          | -0.708842 |   |
| NHL66488.1 | peptidoglycan DD-metalloendopeptidase family protein                                      | -0.71019  |   |
| NHL67574.1 | arginine--tRNA ligase                                                                     | -0.711771 | + |
| NHL67291.1 | lipopolysaccharide heptosyltransferase II                                                 | -0.712218 |   |
| NHL68083.1 | DUF2384 domain-containing protein                                                         | -0.717639 |   |
| NHL66295.1 | lysine N(6)-hydroxylase/L-ornithine N(5)-oxygenase family protein                         | -0.718487 |   |
| NHL68465.1 | GTP cyclohydrolase I FolE2                                                                | -0.719213 | + |
| NHL66468.1 | adenylosuccinate synthase                                                                 | -0.722314 | + |
| NHL66876.1 | hypothetical protein EIB72_10855                                                          | -0.72277  |   |
| NHL66776.1 | regulator                                                                                 | -0.723412 |   |
| NHL67742.1 | class I SAM-dependent rRNA methyltransferase                                              | -0.724148 |   |
| NHL67084.1 | argininosuccinate lyase                                                                   | -0.726687 |   |
| NHL65089.1 | YihA family ribosome biogenesis GTP-binding protein                                       | -0.727527 |   |

|            |                                                                          |           |   |
|------------|--------------------------------------------------------------------------|-----------|---|
| NHL65394.1 | NUDIX hydrolase                                                          | -0.727951 |   |
| NHL67455.1 | RNA polymerase factor sigma-54                                           | -0.732241 |   |
| NHL67381.1 | enoyl-CoA hydratase                                                      | -0.733907 |   |
| NHL66877.1 | excinuclease ABC subunit UvrB                                            | -0.735997 |   |
| NHL66927.1 | phosphatidylserine decarboxylase                                         | -0.737036 |   |
| NHL67826.1 | DNA topoisomerase (ATP-hydrolyzing) subunit B                            | -0.737513 | + |
| NHL67398.1 | DUF3683 domain-containing protein                                        | -0.738441 |   |
| NHL66647.1 | glutamine-hydrolyzing GMP synthase                                       | -0.738815 | + |
| NHL66963.1 | ribosome silencing factor                                                | -0.741564 |   |
| NHL69093.1 | virulence factor family protein                                          | -0.743846 |   |
| NHL65770.1 | CreA family protein                                                      | -0.749414 |   |
| NHL69927.1 | MetQ/NlpA family ABC transporter substrate-binding protein               | -0.751099 |   |
| NHL65401.1 | membrane integrity-associated transporter subunit PqiC                   | -0.754014 |   |
| NHL66114.1 | NAD(P)H:quinone oxidoreductase                                           | -0.754391 |   |
| NHL67373.1 | phosphotransferase                                                       | -0.761168 | + |
| NHL69737.1 | formaldehyde dehydrogenase, glutathione-independent                      | -0.762255 |   |
| NHL65090.1 | cytochrome c4                                                            | -0.768461 |   |
| NHL65743.1 | tRNA (guanosine(37)-N1)-methyltransferase TrmD                           | -0.771436 |   |
| NHL65332.1 | barstar family protein                                                   | -0.77213  |   |
| NHL65652.1 | GNAT family N-acetyltransferase                                          | -0.772945 |   |
| NHL69335.1 | cold-shock protein                                                       | -0.777128 | + |
| NHL65564.1 | mannose-1-phosphate guanylyltransferase/mannose-6-phosphate isomerase    | -0.777683 | + |
| NHL66462.1 | ATP-dependent DNA helicase                                               | -0.780949 | + |
| NHL66734.1 | aspartate kinase                                                         | -0.781659 |   |
| NHL66607.1 | presqualene diphosphate synthase HpnD                                    | -0.782666 |   |
| NHL67635.1 | dihydroneopterin aldolase                                                | -0.783596 |   |
| NHL70006.1 | SDR family NAD(P)-dependent oxidoreductase                               | -0.78389  |   |
| NHL64931.1 | UvrD-helicase domain-containing protein                                  | -0.78529  |   |
| NHL65052.1 | DNA helicase RecQ                                                        | -0.787158 |   |
| NHL67957.1 | hypothetical protein EIB72_16375                                         | -0.788246 | + |
| NHL65412.1 | tRNA guanosine(34) transglycosylase Tgt                                  | -0.789856 |   |
| NHL67085.1 | HAD family phosphatase                                                   | -0.791915 | + |
| NHL66101.1 | UvrD-helicase domain-containing protein                                  | -0.801937 |   |
| NHL71142.1 | hypothetical protein EIB72_32715                                         | -0.802211 |   |
| NHL67384.1 | acyl-CoA dehydrogenase                                                   | -0.803399 | + |
| NHL65206.1 | UbiX family flavin prenyltransferase                                     | -0.804282 |   |
| NHL68453.1 | hypothetical protein EIB72_18905                                         | -0.807806 |   |
| NHL67646.1 | aldehyde dehydrogenase                                                   | -0.811364 | + |
| NHL67052.1 | hypothetical protein EIB72_11780                                         | -0.813129 |   |
| NHL67473.1 | signal recognition particle-docking protein FtsY                         | -0.81344  |   |
| NHL65803.1 | elongation factor 4                                                      | -0.819765 | + |
| NHL69062.1 | cold-shock protein                                                       | -0.826233 |   |
| NHL65833.1 | glycosyltransferase family 4 protein                                     | -0.831856 | + |
| NHL65420.1 | pyrroline-5-carboxylate reductase                                        | -0.832268 |   |
| NHL71114.1 | bifunctional aconitate hydratase 2/2-methylisocitrate dehydratase        | -0.83375  | + |
| NHL67824.1 | chromosomal replication initiator protein DnaA                           | -0.837533 |   |
| NHL66751.1 | peptidylprolyl isomerase                                                 | -0.84155  |   |
| NHL66852.1 | hypothetical protein EIB72_10735                                         | -0.844104 |   |
| NHL65804.1 | signal peptidase I                                                       | -0.84432  |   |
| NHL68472.1 | RNA polymerase sigma factor RpoD                                         | -0.848581 | + |
| NHL68562.1 | site-specific DNA-methyltransferase                                      | -0.861609 |   |
| NHL69746.1 | betaine-aldehyde dehydrogenase                                           | -0.862867 | + |
| NHL67149.1 | GNAT family acetyltransferase                                            | -0.868083 |   |
| NHL66464.1 | hypothetical protein EIB72_08700                                         | -0.868552 |   |
| NHL67057.1 | ABC transporter substrate-binding protein                                | -0.873631 |   |
| NHL71032.1 | DUF3022 domain-containing protein                                        | -0.87587  |   |
| NHL65563.1 | dTDP-4-dehydrorhamnose reductase                                         | -0.880985 |   |
| NHL67362.1 | glycine-tRNA ligase subunit alpha                                        | -0.886421 |   |
| NHL66568.1 | AIPR family protein                                                      | -0.887604 |   |
| NHL67494.1 | MetQ/NlpA family ABC transporter substrate-binding protein               | -0.889715 | + |
| NHL70609.1 | transporter substrate-binding domain-containing protein                  | -0.891418 |   |
| NHL69547.1 | bifunctional nicotinamide-nucleotide adenyltransferase/Nudix hydroxylase | -0.894004 |   |
| NHL66796.1 | dihydropolyl dehydrogenase                                               | -0.897363 | + |
| NHL65334.1 | glyoxalase/bleomycin resistance/extradiol dioxygenase family protein     | -0.900736 |   |
| NHL65709.1 | phosphoglycolate phosphatase                                             | -0.904579 |   |
| NHL65457.1 | DNA mismatch repair endonuclease MutL                                    | -0.90465  | + |
| NHL67397.1 | HIT family protein                                                       | -0.907289 |   |
| NHL65761.1 | acyl-CoA thioesterase                                                    | -0.919028 |   |
| NHL70447.1 | adenylosuccinate synthase                                                | -0.920397 |   |
| NHL66980.1 | sulfurtransferase                                                        | -0.922164 | + |
| NHL66210.1 | FadR family transcriptional regulator                                    | -0.922576 |   |
| NHL67159.1 | 50S ribosomal protein L28                                                | -0.92473  | + |
| NHL64876.1 | 16S rRNA (guanine(527)-N(7))-methyltransferase RsmG                      | -0.924771 |   |
| NHL66381.1 | DUF3022 domain-containing protein                                        | -0.928651 |   |
| NHL68041.1 | copper oxidase                                                           | -0.928884 | + |
| NHL66305.1 | cob(II)yrinic acid a,c-diamide adenosyltransferase                       | -0.932419 |   |
| NHL67015.1 | RidA family protein                                                      | -0.937407 |   |
| NHL68105.1 | aromatic alcohol reductase                                               | -0.943359 |   |
| NHL64933.1 | DUF2971 domain-containing protein                                        | -0.949828 | + |
| NHL65117.1 | sulfur carrier protein ThiS                                              | -0.950296 |   |
| NHL65647.1 | replication-associated recombination protein A                           | -0.951735 | + |
| NHL66522.1 | Xcc1710-like domain-containing protein                                   | -0.952043 | + |
| NHL66552.1 | AAA family ATPase                                                        | -0.953561 |   |
| NHL68947.1 | delta(1)-pyrroline-2-carboxylate reductase family protein                | -0.955568 |   |
| NHL68123.1 | co-chaperone GroES                                                       | -0.956493 | + |
| NHL69039.1 | alcohol dehydrogenase AdhP                                               | -0.957526 | + |
| NHL68037.1 | heavy metal response regulator transcription factor                      | -0.960819 |   |
| NHL69413.1 | dicarboxylate/amino acid:cation symporter                                | -0.961175 | + |
| NHL68686.1 | alkyl hydroperoxide reductase subunit F                                  | -0.962978 |   |
| NHL64813.1 | site-specific DNA-methyltransferase                                      | -0.964589 | + |
| NHL68799.1 | NAD(P)/FAD-dependent oxidoreductase                                      | -0.967255 |   |
| NHL67798.1 | phosphonoacetate hydrolase                                               | -0.975357 | + |
| NHL66649.1 | IMP dehydrogenase                                                        | -0.977537 | + |
| NHL66511.1 | helix-hairpin-helix domain-containing protein                            | -0.980288 |   |
| NHL65209.1 | peptide chain release factor 1                                           | -0.987919 |   |
| NHL66323.1 | precorrin-2 C(20)-methyltransferase                                      | -0.991252 | + |
| NHL68797.1 | excinuclease ABC subunit A                                               | -0.99604  | + |
| NHL65236.1 | ribose-phosphate 3-epimerase                                             | -0.996721 | + |

|                       |                                                                                    |          |   |
|-----------------------|------------------------------------------------------------------------------------|----------|---|
| NHL66979.1            | DNA polymerase III subunit alpha                                                   | -0.99818 |   |
| NHL69663.1            | DcrB-related protein                                                               | -1.00421 |   |
| NHL66777.1            | single-stranded-DNA-specific exonuclease RecJ                                      | -1.00567 | + |
| NHL67468.1            | aminoacyl-tRNA hydrolase                                                           | -1.01116 |   |
| NHL65410.1            | protein translocase subunit SecD                                                   | -1.01943 |   |
| NHL67160.1            | 50S ribosomal protein L33                                                          | -1.02609 |   |
| NHL67563.1,NHL70599.1 | ferritin-like domain-containing protein                                            | -1.02623 | + |
| NHL71040.1            | hypothetical protein EIB72_32205                                                   | -1.03437 |   |
| NHL65671.1            | transcription elongation factor GreB                                               | -1.04332 |   |
| NHL66147.1            | outer membrane protein assembly factor BamC                                        | -1.04499 | + |
| NHL66437.1            | ABC-F family ATPase                                                                | -1.05819 | + |
| NHL68787.1            | aromatic amino acid lyase                                                          | -1.06209 |   |
| NHL65296.1            | ribonucleotide-diphosphate reductase subunit beta                                  | -1.06892 | + |
| NHL66168.1            | 2-oxoglutarate dehydrogenase E1 component                                          | -1.07553 | + |
| NHL66354.1            | alpha/beta hydrolase                                                               | -1.08747 | + |
| NHL67396.1            | DUF971 domain-containing protein                                                   | -1.08891 |   |
| NHL67349.1            | HAD-IA family hydrolase                                                            | -1.08893 |   |
| NHL65299.1            | glycine zipper 2TM domain-containing protein                                       | -1.09288 |   |
| NHL66688.1            | ArsC family reductase                                                              | -1.09696 | + |
| NHL71077.1            | chemotaxis protein                                                                 | -1.09836 | + |
| NHL66459.1            | peptidoglycan editing factor PgeF                                                  | -1.09884 |   |
| NHL65280.1            | 50S ribosomal protein L27                                                          | -1.10735 | + |
| NHL65821.1            | ParD-like family protein                                                           | -1.11123 | + |
| NHL66127.1            | PAS and helix-turn-helix domain-containing protein                                 | -1.11264 | + |
| NHL66704.1            | DEAD/DEAH box helicase                                                             | -1.12116 |   |
| NHL69965.1            | amidohydrolase                                                                     | -1.12413 |   |
| NHL71081.1            | FAD-dependent oxidoreductase                                                       | -1.13565 |   |
| NHL66939.1            | TIGR00730 family Rossmann fold protein                                             | -1.13758 | + |
| NHL70878.1            | LuxR family transcriptional regulator                                              | -1.13971 |   |
| NHL66164.1            | HlyD family efflux transporter periplasmic adaptor subunit                         | -1.14958 |   |
| NHL68260.1            | fucose-binding lectin protein                                                      | -1.15188 |   |
| NHL70683.1            | response regulator                                                                 | -1.15503 |   |
| NHL67111.1            | nicotinate-nucleotide-dimethylbenzimidazole phosphoribosyltransferase              | -1.1554  | + |
| NHL65499.1            | transcriptional repressor NrdR                                                     | -1.16124 |   |
| NHL66914.1            | NADH-quinone oxidoreductase subunit B                                              | -1.16342 |   |
| NHL69526.1            | diaminopimelate decarboxylase                                                      | -1.1648  | + |
| NHL64925.1            | aminomethyl-transferring glycine dehydrogenase                                     | -1.16839 | + |
| NHL64882.1            | FOF1 ATP synthase subunit C                                                        | -1.16847 |   |
| NHL68583.1            | porin                                                                              | -1.17861 |   |
| NHL67221.1            | tRNA (adenosine(37)-N6)-threonylcarbamoyltransferase complex ATPase subunit type 1 | -1.18005 |   |
| NHL69956.1            | 4-aminobutyrate--2-oxoglutarate transaminase                                       | -1.18535 |   |
| NHL67627.1            | phosphodiesterase                                                                  | -1.19044 |   |
| NHL70221.1            | response regulator                                                                 | -1.1936  |   |
| NHL66995.1            | DUF1841 family protein                                                             | -1.21135 |   |
| NHL68558.1            | pilus assembly protein FimV                                                        | -1.21212 |   |
| NHL66851.1            | type VI secretion system tip protein VgrG                                          | -1.21708 | + |
| NHL64996.1            | 16S rRNA (cytidine[1402]-2-O)-methyltransferase                                    | -1.24587 |   |
| NHL71070.1            | carbamoyltransferase                                                               | -1.24789 |   |
| NHL66812.1            | competence/damage-inducible protein A                                              | -1.25719 | + |
| NHL70892.1            | thioesterase                                                                       | -1.2693  |   |
| NHL67549.1            | D-alanyl-D-alanine carboxypeptidase                                                | -1.28058 | + |
| NHL66700.1            | uracil-DNA glycosylase                                                             | -1.28079 | + |
| NHL64994.1            | MBL fold metallo-hydrolase                                                         | -1.28271 |   |
| NHL67192.1            | EAL domain-containing protein                                                      | -1.29529 |   |
| NHL67224.1            | pirin family protein                                                               | -1.30806 |   |
| NHL68094.1            | BON domain-containing protein                                                      | -1.3163  | + |
| NHL70251.1            | SDR family oxidoreductase                                                          | -1.31973 | + |
| NHL65498.1            | serine hydroxymethyltransferase                                                    | -1.32205 | + |
| NHL67882.1            | fumarate/nitrate reduction transcriptional regulator Fnr                           | -1.3247  | + |
| NHL68713.1            | prolyl aminopeptidase                                                              | -1.32815 |   |
| NHL66322.1            | precorrin-3B C(17)-methyltransferase                                               | -1.33184 | + |
| NHL65384.1            | Holliday junction branch migration protein RuvA                                    | -1.33508 |   |
| NHL67327.1            | galactonate dehydratase                                                            | -1.34195 |   |
| NHL70967.1            | alkylphosphonate utilization protein                                               | -1.35105 | + |
| NHL69957.1            | NADP-dependent succinate-semialdehyde dehydrogenase                                | -1.36643 | + |
| NHL68500.1            | peptidoglycan DD-metalloendopeptidase family protein                               | -1.37966 | + |
| NHL68954.1            | DUF1311 domain-containing protein                                                  | -1.42494 |   |
| NHL69607.1            | NADH-quinone oxidoreductase subunit Nuol                                           | -1.44212 |   |
| NHL67280.1            | threonylcarbamoyl-AMP synthase                                                     | -1.44336 |   |
| NHL65951.1            | transglycosylase SLT domain-containing protein                                     | -1.44913 | + |
| NHL71003.1            | hypothetical protein EIB72_32020                                                   | -1.45705 |   |
| NHL71059.1            | BON domain-containing protein                                                      | -1.46244 |   |
| NHL65282.1            | glutamate 5-kinase                                                                 | -1.47445 | + |
| NHL66308.1            | cobalamin biosynthesis protein CobW                                                | -1.47778 | + |
| NHL67356.1            | rRNA maturation RNase YbeY                                                         | -1.49636 |   |
| NHL68461.1            | aromatic ring-hydroxylating dioxygenase subunit alpha                              | -1.50129 | + |
| NHL64943.1            | tetratricopeptide repeat protein                                                   | -1.50406 | + |
| NHL70134.1            | PAAR domain-containing protein                                                     | -1.5041  | + |
| NHL71080.1            | glutathione-dependent formaldehyde dehydrogenase                                   | -1.5083  | + |
| NHL68687.1            | peroxiredoxin                                                                      | -1.51846 | + |
| NHL66888.1            | hypothetical protein EIB72_10935                                                   | -1.53886 |   |
| NHL66853.1            | hypothetical protein EIB72_10740                                                   | -1.54139 |   |
| NHL68847.1            | ABC transporter ATP-binding protein                                                | -1.56119 | + |
| NHL66632.1            | allantoicase                                                                       | -1.56493 |   |
| NHL69027.1            | recombination-associated protein RdgC                                              | -1.57271 |   |
| NHL66563.1            | alpha/beta hydrolase                                                               | -1.59948 |   |
| NHL65368.1            | amino acid ABC transporter ATP-binding protein                                     | -1.59991 | + |
| NHL68830.1            | c-type cytochrome                                                                  | -1.60282 |   |
| NHL67644.1            | cupredoxin domain-containing protein                                               | -1.60578 |   |
| NHL71125.1            | hypothetical protein EIB72_32630                                                   | -1.66128 |   |
| NHL68908.1            | aspartate aminotransferase family protein                                          | -1.6782  | + |
| NHL68160.1            | Hsp70 family protein                                                               | -1.6784  |   |
| NHL64927.1            | glycine cleavage system aminomethyltransferase GcvT                                | -1.69377 |   |
| NHL65885.1            | exodeoxyribonuclease V subunit beta                                                | -1.72146 | + |
| NHL69923.1            | hypothetical protein EIB72_26475                                                   | -1.75696 |   |
| NHL68794.1            | beta-ketoacyl-ACP synthase                                                         | -1.77083 | + |
| NHL64812.1            | DEAD/DEAH box helicase family protein                                              | -1.78194 | + |
| NHL65265.1            | UDP-3-O-acyl-N-acetylglucosamine deacetylase                                       | -1.78202 |   |

|                       |                                                                |          |   |
|-----------------------|----------------------------------------------------------------|----------|---|
| NHL67172.1            | dUTP diphosphatase                                             | -1.82987 |   |
| NHL66190.1            | DUF2968 domain-containing protein                              | -1.85575 |   |
| NHL66083.1            | sugar ABC transporter substrate-binding protein                | -1.88004 |   |
| NHL68026.1            | trans-aconitate 2-methyltransferase                            | -1.89573 |   |
| NHL65550.1            | hydroxymethylpyrimidine/phosphomethylpyrimidine kinase         | -1.90308 |   |
| NHL66217.1            | NUDX hydrolase                                                 | -1.92013 |   |
| NHL66798.1            | pyruvate dehydrogenase (acetyl-transferring), homodimeric type | -1.93717 | + |
| NHL68849.1            | ABC transporter substrate-binding protein                      | -2.04183 | + |
| NHL65799.1            | sigma-E factor negative regulatory protein                     | -2.04931 | + |
| NHL69702.1            | peptidase                                                      | -2.13943 | + |
| NHL66309.1            | cobaltochelataase subunit CobN                                 | -2.14868 |   |
| NHL71054.1            | DUF4142 domain-containing protein                              | -2.21782 | + |
| NHL71053.1            | DUF892 family protein                                          | -2.24272 | + |
| NHL65451.1            | DnaA regulatory inactivator Hda                                | -2.25132 | + |
| NHL69933.1            | alpha/beta hydrolase                                           | -2.2548  | + |
| NHL66222.1            | FMNH2-dependent alkanesulfonate monooxygenase                  | -2.29798 | + |
| NHL67522.1            | HPr family phosphocarrier protein                              | -2.31396 | + |
| NHL68559.1            | tRNA pseudouridine(38-40) synthase TruA                        | -2.3246  | + |
| NHL65331.1            | ribonuclease                                                   | -2.34891 |   |
| NHL68869.1            | squalene/phytoene synthase family protein                      | -2.34956 | + |
| NHL66794.1            | D-alanyl-D-alanine endopeptidase                               | -2.39734 | + |
| NHL65584.1            | 3-deoxy-D-manno-oct-2-ulosonic acid (Kdo) hydroxylase          | -2.49549 |   |
| NHL67350.1            | 3,4-dihydroxy-2-butanone-4-phosphate synthase                  | -2.50192 | + |
| NHL65010.1            | DUF2239 family protein                                         | -2.50311 |   |
| NHL65486.1            | hypothetical protein E1B72_03630                               | -2.51645 | + |
| NHL69929.1            | 2-hydroxycarboxylate transporter family protein                | -2.56698 | + |
| NHL64999.1            | BON domain-containing protein                                  | -2.69355 | + |
| NHL65306.1            | type II 3-dehydroquinate dehydratase                           | -2.88405 | + |
| NHL70247.1            | DUF1842 domain-containing protein                              | -2.90351 |   |
| NHL71057.1            | DUF2795 domain-containing protein                              | -2.92453 | + |
| NHL64947.1;NHL64946.1 | tetratricopeptide repeat protein                               | -3.12401 | + |
| NHL69414.1            | gamma-glutamyltransferase                                      | -3.24421 | + |
| NHL69931.1            | sigma-54-dependent Fis family transcriptional regulator        | -3.43161 | + |
| NHL71042.1            | PRC-barrel domain containing protein                           | -3.49615 | + |
| NHL68782.1            | acyl carrier protein                                           | -3.63042 | + |
| NHL69690.1            | NADP-dependent malic enzyme                                    | -3.71373 | + |
| NHL71010.1            | maltose alpha-D-glucosyltransferase                            | -3.87764 | + |
| NHL66148.1            | DNA-binding protein                                            | -4.03791 | + |
| NHL65076.1            | 50S ribosomal protein L30                                      | -4.20745 |   |
| NHL67274.1            | DegQ family serine endoprotease                                | -5.45983 | + |
| NHL68043.1            | copper homeostasis periplasmic binding protein CopC            | -5.76143 | + |
| NHL67420.1            | M48 family metalloprotease                                     | -6.05311 | + |
| NHL68042.1            | copper-binding protein                                         | -6.43107 | + |

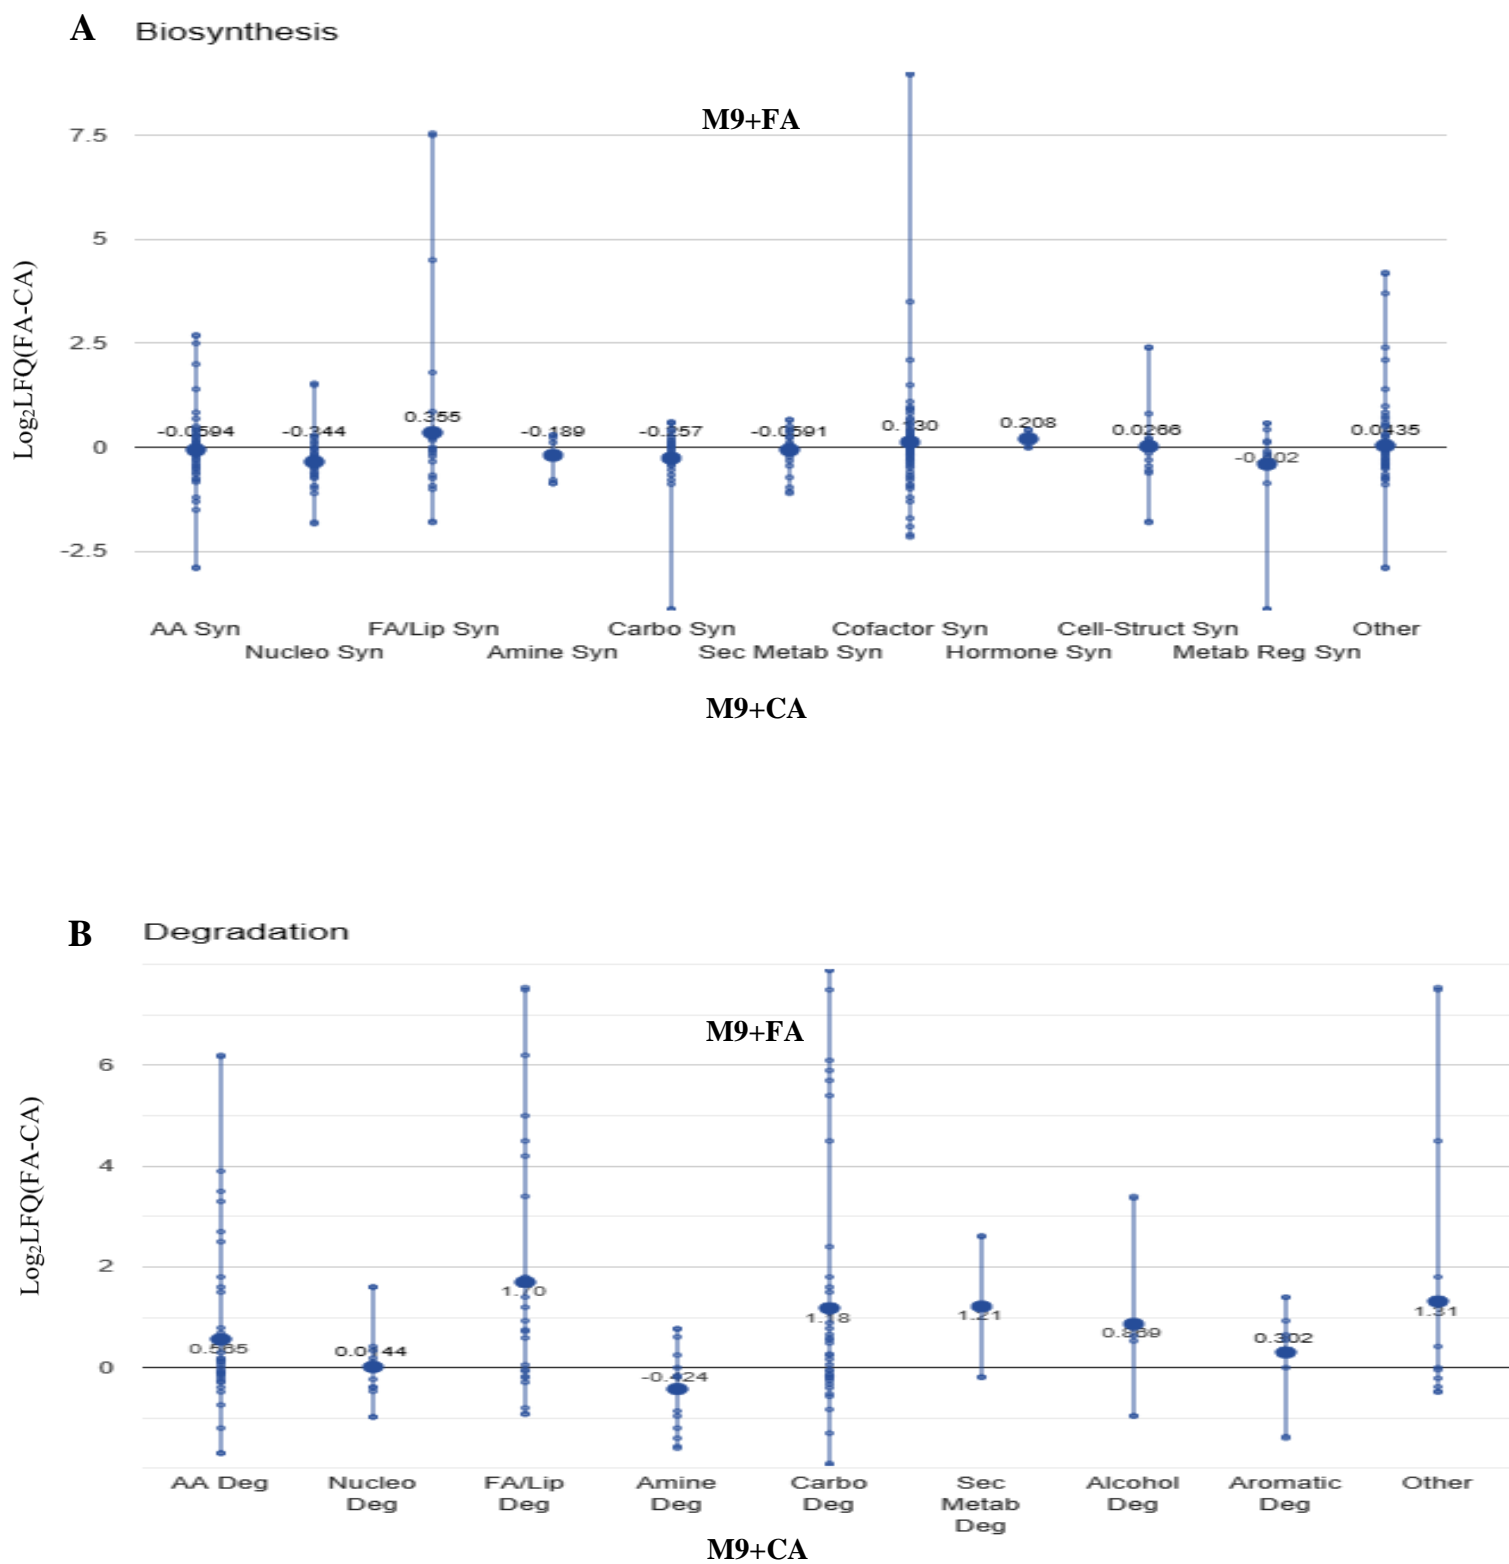

**FIG S1** Difference in the abundance of proteins belonging to different metabolic pathways during the cultivation of *B. ambifaria* T16 in M9 minimal medium with fusaric acid (M9+FA) or sodium citrate (M9+CA) as the sole carbon source. Each of the small dots represents a data value ( $\log_2\text{LFQ}[\text{FA-CA}]$ ) for an individual protein within the

metabolic pathway. The line connecting them shows the full range of values for that metabolic pathway. **A.** Metabolic pathways for Biosynthesis: AA: amino acids, Nucleo: nucleotides and nucleosides, FA/Lip: fatty acids and lipids, Amine: amines and polyamines, Carbo: Carbohydrates, Sec Metab: Secondary Metabolites, Cell-struct: Cell structure, Metab Reg: Metabolic Regulator. **B.** Metabolic pathways for Degradation: Carbo: carbohydrates and carboxylates degradation, Aromatic: aromatic compounds. The Proteomic dataset was uploaded in the PGDB of *B. ambifaria* T16 and visualized with the Pathway Tools Omics Dashboard.

**TABLE S2** Evaluation of *B. ambifaria* growth in the presence of toluene

| <i>B. ambifaria</i> strain              | Final OD <sub>600</sub> <sup>1</sup> |
|-----------------------------------------|--------------------------------------|
| <b>T16</b> (wild type)                  | 1.75 ± 0.096                         |
| <b>FA3</b> ( <i>mldD::mini-Tn5Tel</i> ) | 0.56 ± 0.03                          |

<sup>1</sup>Cultures were grown during 24 h in screw capped tubes containing M9 minimal medium with 0.2% (wt/vol) sodium citrate and 6 mM toluene. Means ± SD of three independent cultures are shown.

**TABLE S3** Sensitivity to SDS/EDTA of *B. ambifaria* strains

| <i>B. ambifaria</i> strain              | Growth in 0.5%    | Growth in 0.5%    | Growth in 0.5%    |
|-----------------------------------------|-------------------|-------------------|-------------------|
|                                         | SDS + 0.5 mM      | SDS + 1 mM        | SDS + 1.5 mM      |
|                                         | EDTA <sup>1</sup> | EDTA <sup>1</sup> | EDTA <sup>1</sup> |
| <b>T16</b> (wild type)                  | +                 | +                 | +                 |
| <b>FA3</b> ( <i>mldD::mini-Tn5Tel</i> ) | -                 | -                 | -                 |

<sup>1</sup>Growth was evaluated in LB agar plates containing SDS + EDTA according to Yeow et al. (1).

## References

1. Yeow J, Tan KW, Holdbrook DA, Chong Z-S, Marzinek JK, Bond PJ, Chng S-S. 2018. The architecture of the OmpC-MlaA complex sheds light on the maintenance of outer membrane lipid asymmetry in *Escherichia coli*. J Biol Chem 293:11325-11340.
